# Supplementary material for: Longitudinal assessment of sputum microbiome by sequencing of the 16S rRNA gene in non-cystic fibrosis bronchiectasis patients
Source: PLoS One. 2017 Feb 7;12(2):e0170622. doi: 10.1371/journal.pone.0170622 (PMC5295668; doi:10.1371/journal.pone.0170622)
Supplement: S1 Table — (XLSX) [file pone.0170622.s010.xlsx]

## Sheet: Data
#SampleID	BarcodeSequence	LinkerPrimerSequence	MID	ReversePrimer	StudyNumber	SampleOrder	VisitLetter	Year	BETR	Sex	Age	Height	Weight	BMI	BMIClass	Smoking	Cause	PPxABx	AcycloPPx	AmoxPPx	AugPPx	AziPPx	CazPPx	CaxPPx	CiproPPx	ClaPPx	ColoPPx	SepPPx	DoxyPPx	EthPPx	FlucloxPPx	FluclonPPx	GentIVPPx	GentNebPPx	MeroIVPPx	MinoPPx	MoxiPPx	PenPPx	RifPPx	TazoPPx	TriPPx	NRAbxMonth	NRAbxVisit	AcycloNR	AmoxNR	AugNR	AziNR	CamNR	CiproNR
01A	AACGCACGCTAG	CCGTCAATTYMTTTRAGT	MID001	CCTACGGGAGGCAGCAG	1	1	A	2010	B	F	58	167	72.9	21.8263	Normal	Non	PCD	1	0	0	0	0	0	0	0	0	0	0	1	0	0	0	0	0	0	0	0	0	0	0	0	0	0	0	0	0	0	0	0
01B	ACACTGTTCATG	CCGTCAATTYMTTTRAGT	MID013	CCTACGGGAGGCAGCAG	1	2	B	2011	B	F	58	167	72.9	21.8263	Normal	Non	PCD	1	0	0	0	0	0	0	0	0	0	0	1	0	0	0	0	0	0	0	0	0	0	0	0	0	0	0	0	0	0	0	0
01C	ACCAGACGATGC	CCGTCAATTYMTTTRAGT	MID025	CCTACGGGAGGCAGCAG	1	3	C	2011	B	F	58	167	72.9	21.8263	Normal	Non	PCD	1	0	0	0	0	0	0	0	0	0	0	1	0	0	0	0	0	0	0	0	0	0	0	0	0	0	0	0	0	0	0	0
01D	ACGCTCATGGAT	CCGTCAATTYMTTTRAGT	MID037	CCTACGGGAGGCAGCAG	1	4	De	2011	E	F	58	167	72.9	21.8263	Normal	Non	PCD	1	0	0	0	0	0	0	0	0	0	0	1	0	0	0	0	0	0	0	0	0	0	0	0	0	0	0	0	0	0	0	0
01E	ACTCACGGTATG	CCGTCAATTYMTTTRAGT	MID049	CCTACGGGAGGCAGCAG	1	5	E	2011	B	F	58	167	72.9	21.8263	Normal	Non	PCD	1	0	0	0	0	0	0	0	0	0	0	1	0	0	0	0	0	0	0	0	0	0	0	0	0	0	0	0	0	0	0	0
01F	AGACCGTCAGAC	CCGTCAATTYMTTTRAGT	MID061	CCTACGGGAGGCAGCAG	1	6	F	2011	B	F	58	167	72.9	21.8263	Normal	Non	PCD	0	0	0	0	0	0	0	0	0	0	0	0	0	0	0	0	0	0	0	0	0	0	0	0	0	0	0	0	0	0	0	0
01G	AGCACGAGCCTA	CCGTCAATTYMTTTRAGT	MID073	CCTACGGGAGGCAGCAG	1	7	G	2011	B	F	58	167	72.9	21.8263	Normal	Non	PCD	0	0	0	0	0	0	0	0	0	0	0	0	0	0	0	0	0	0	0	0	0	0	0	0	0	0	0	0	0	0	0	0
02A	AGCTGACTAGTC	CCGTCAATTYMTTTRAGT	MID085	CCTACGGGAGGCAGCAG	2	1	A	2010	B	F	79	158	60.4	19.1139	Normal	Ex	Idiopathic	0	0	0	0	0	0	0	0	0	0	0	0	0	0	0	0	0	0	0	0	0	0	0	0	0	0	0	0	0	0	0	0
02B	AACTCGTCGATG	CCGTCAATTYMTTTRAGT	MID002	CCTACGGGAGGCAGCAG	2	2	Be	2011	T	F	79	158	60.4	19.1139	Normal	Ex	Idiopathic	0	0	0	0	0	0	0	0	0	0	0	0	0	0	0	0	0	0	0	0	0	0	0	0	0	0	0	0	0	0	0	0
2BCe	ACAGACCACTCA	CCGTCAATTYMTTTRAGT	MID014	CCTACGGGAGGCAGCAG	2	3	BCe	2011	T	F	79	158	60.4	19.1139	Normal	Ex	Idiopathic	0	0	0	0	0	0	0	0	0	0	0	0	0	0	0	0	0	0	0	0	0	0	0	0	0	0	0	0	0	0	0	0
02C	ACCAGCGACTAG	CCGTCAATTYMTTTRAGT	MID026	CCTACGGGAGGCAGCAG	2	4	C	2011	B	F	79	158	60.4	19.1139	Normal	Ex	Idiopathic	0	0	0	0	0	0	0	0	0	0	0	0	0	0	0	0	0	0	0	0	0	0	0	0	0	0	0	0	0	0	0	0
02D	ACGGATCGTCAG	CCGTCAATTYMTTTRAGT	MID038	CCTACGGGAGGCAGCAG	2	5	D	2011	B	F	79	158	60.4	19.1139	Normal	Ex	Idiopathic	0	0	0	0	0	0	0	0	0	0	0	0	0	0	0	0	0	0	0	0	0	0	0	0	0	0	0	0	0	0	0	0
02E	ACTCAGATACTC	CCGTCAATTYMTTTRAGT	MID050	CCTACGGGAGGCAGCAG	2	6	E	2011	B	F	79	158	60.4	19.1139	Normal	Ex	Idiopathic	0	0	0	0	0	0	0	0	0	0	0	0	0	0	0	0	0	0	0	0	0	0	0	0	0	0	0	0	0	0	0	0
02F	AGACGTGCACTG	CCGTCAATTYMTTTRAGT	MID062	CCTACGGGAGGCAGCAG	2	7	F	2011	B	F	79	158	60.4	19.1139	Normal	Ex	Idiopathic	0	0	0	0	0	0	0	0	0	0	0	0	0	0	0	0	0	0	0	0	0	0	0	0	0	0	0	0	0	0	0	0
02G	AGCAGCACTTGT	CCGTCAATTYMTTTRAGT	MID074	CCTACGGGAGGCAGCAG	2	8	G	2011	B	F	79	158	60.4	19.1139	Normal	Ex	Idiopathic	0	0	0	0	0	0	0	0	0	0	0	0	0	0	0	0	0	0	0	0	0	0	0	0	0	0	0	0	0	0	0	0
03A	AGCTTGACAGCT	CCGTCAATTYMTTTRAGT	MID086	CCTACGGGAGGCAGCAG	3	1	A	2010	B	F	67	165	74.6	22.6061	Normal	Ex	Immunodeficiency	0	0	0	0	0	0	0	0	0	0	0	0	0	0	0	0	0	0	0	0	0	0	0	0	0	0	0	0	0	0	0	0
03ABe	AACTGTGCGTAC	CCGTCAATTYMTTTRAGT	MID003	CCTACGGGAGGCAGCAG	3	2	ABe	2010	E	F	67	165	74.6	22.6061	Normal	Ex	Immunodeficiency	0	0	0	0	0	0	0	0	0	0	0	0	0	0	0	0	0	0	0	0	0	0	0	0	0	0	0	0	0	0	0	0
03B	ACAGAGTCGGCT	CCGTCAATTYMTTTRAGT	MID015	CCTACGGGAGGCAGCAG	3	3	B	2011	R	F	67	165	74.6	22.6061	Normal	Ex	Immunodeficiency	0	0	0	0	0	0	0	0	0	0	0	0	0	0	0	0	0	0	0	0	0	0	0	0	0	0	0	0	0	0	0	0
03C	ACCGCAGAGTCA	CCGTCAATTYMTTTRAGT	MID027	CCTACGGGAGGCAGCAG	3	4	C	2011	B	F	67	165	74.6	22.6061	Normal	Ex	Immunodeficiency	0	0	0	0	0	0	0	0	0	0	0	0	0	0	0	0	0	0	0	0	0	0	0	0	0	0	0	0	0	0	0	0
03D	ACGGTGAGTGTC	CCGTCAATTYMTTTRAGT	MID039	CCTACGGGAGGCAGCAG	3	5	D	2011	B	F	67	165	74.6	22.6061	Normal	Ex	Immunodeficiency	0	0	0	0	0	0	0	0	0	0	0	0	0	0	0	0	0	0	0	0	0	0	0	0	0	0	0	0	0	0	0	0
03E	ACTCGATTCGAT	CCGTCAATTYMTTTRAGT	MID051	CCTACGGGAGGCAGCAG	3	6	Ee	2011	E	F	67	165	74.6	22.6061	Normal	Ex	Immunodeficiency	0	0	0	0	0	0	0	0	0	0	0	0	0	0	0	0	0	0	0	0	0	0	0	0	0	0	0	0	0	0	0	0
03F	AGACTGCGTACT	CCGTCAATTYMTTTRAGT	MID063	CCTACGGGAGGCAGCAG	3	7	F	2011	R	F	67	165	74.6	22.6061	Normal	Ex	Immunodeficiency	0	0	0	0	0	0	0	0	0	0	0	0	0	0	0	0	0	0	0	0	0	0	0	0	0	0	0	0	0	0	0	0
03G	AGCAGTCGCGAT	CCGTCAATTYMTTTRAGT	MID075	CCTACGGGAGGCAGCAG	3	8	G	2011	B	F	67	165	74.6	22.6061	Normal	Ex	Immunodeficiency	0	0	0	0	0	0	0	0	0	0	0	0	0	0	0	0	0	0	0	0	0	0	0	0	0	0	0	0	0	0	0	0
04A	AGGACGCACTGT	CCGTCAATTYMTTTRAGT	MID087	CCTACGGGAGGCAGCAG	4	1	A	2010	B	F	33	155	49.2	15.871	Severely Underweight	Non	PostInfection	0	0	0	0	0	0	0	0	0	0	0	0	0	0	0	0	0	0	0	0	0	0	0	0	0	0	0	0	0	0	0	0
04B	AAGAGATGTCGA	CCGTCAATTYMTTTRAGT	MID004	CCTACGGGAGGCAGCAG	4	2	B	2011	B	F	33	155	49.2	15.871	Severely Underweight	Non	PostInfection	0	0	0	0	0	0	0	0	0	0	0	0	0	0	0	0	0	0	0	0	0	0	0	0	0	0	0	0	0	0	0	0
04C	ACAGCAGTGGTC	CCGTCAATTYMTTTRAGT	MID016	CCTACGGGAGGCAGCAG	4	3	C	2011	B	F	33	155	49.2	15.871	Severely Underweight	Non	PostInfection	0	0	0	0	0	0	0	0	0	0	0	0	0	0	0	0	0	0	0	0	0	0	0	0	0	0	0	0	0	0	0	0
05A	ACCTCGATCAGA	CCGTCAATTYMTTTRAGT	MID028	CCTACGGGAGGCAGCAG	5	1	A	2010	B	F	68	167	58.6	17.5449	Underweight	NA	ABPA	0	0	0	0	0	0	0	0	0	0	0	0	0	0	0	0	0	0	0	0	0	0	0	0	0	0	0	0	0	0	0	0
06A	ACGTACTCAGTG	CCGTCAATTYMTTTRAGT	MID040	CCTACGGGAGGCAGCAG	6	1	A	2010	B	F	42	164	44.6	13.5976	Severely Underweight	Non	Idiopathic	1	0	0	0	0	0	0	0	0	0	0	1	0	0	0	0	0	0	0	0	0	0	0	0	0	0	0	0	0	0	0	0
06B	ACTCGCACAGGA	CCGTCAATTYMTTTRAGT	MID052	CCTACGGGAGGCAGCAG	6	2	B	2011	B	F	42	164	44.6	13.5976	Severely Underweight	Non	Idiopathic	1	0	0	0	0	0	0	0	0	0	0	1	0	0	0	0	0	0	0	0	0	0	0	0	0	0	0	0	0	0	0	0
06C	AGAGAGCAAGTG	CCGTCAATTYMTTTRAGT	MID064	CCTACGGGAGGCAGCAG	6	3	Ce	2011	E	F	42	164	44.6	13.5976	Severely Underweight	Non	Idiopathic	1	0	0	0	0	0	0	0	0	0	0	1	0	0	0	0	0	0	0	0	0	0	0	0	0	0	0	0	0	0	0	0
06D	AGCATATGAGAG	CCGTCAATTYMTTTRAGT	MID076	CCTACGGGAGGCAGCAG	6	4	D	2011	R	F	42	164	44.6	13.5976	Severely Underweight	Non	Idiopathic	1	0	0	0	0	0	0	0	0	0	0	1	0	0	0	0	0	0	0	0	0	0	0	0	0	0	0	0	0	0	0	0
06E	AGGCTACACGAC	CCGTCAATTYMTTTRAGT	MID088	CCTACGGGAGGCAGCAG	6	5	E	2011	B	F	42	164	44.6	13.5976	Severely Underweight	Non	Idiopathic	1	0	0	0	0	0	0	0	0	0	0	1	0	0	0	0	0	0	1	0	0	0	0	0	0	0	0	0	0	0	0	0
06F	AAGCTGCAGTCG	CCGTCAATTYMTTTRAGT	MID005	CCTACGGGAGGCAGCAG	6	6	F	2011	B	F	42	164	44.6	13.5976	Severely Underweight	Non	Idiopathic	1	0	0	0	0	0	0	0	0	0	0	1	0	0	0	0	0	0	0	0	0	0	0	0	0	0	0	0	0	0	0	0
06FGe	ACAGCTAGCTTG	CCGTCAATTYMTTTRAGT	MID017	CCTACGGGAGGCAGCAG	6	7	Fge	2011	E	F	42	164	44.6	13.5976	Severely Underweight	Non	Idiopathic	1	0	0	0	0	0	0	0	0	0	0	1	0	0	0	0	0	0	0	0	0	0	0	0	0	0	0	0	0	0	0	0
06G	ACCTGTCTCTCT	CCGTCAATTYMTTTRAGT	MID029	CCTACGGGAGGCAGCAG	6	8	G	2011	R	F	42	164	44.6	13.5976	Severely Underweight	Non	Idiopathic	1	0	0	0	0	0	0	0	0	0	0	1	0	0	0	0	0	0	0	0	0	0	0	0	0	0	0	0	0	0	0	0
07A	ACGTCTGTAGCA	CCGTCAATTYMTTTRAGT	MID041	CCTACGGGAGGCAGCAG	7	1	A	2010	B	M	59	NA	NA	NA	NA	NA	Idiopathic	1	0	0	0	1	0	0	0	0	1	0	0	0	0	0	0	0	0	0	0	0	0	0	0	0	0	0	0	0	0	0	0
08A	ACTCTTCTAGAG	CCGTCAATTYMTTTRAGT	MID053	CCTACGGGAGGCAGCAG	8	1	A	2010	B	F	59	162	62.7	19.3519	Normal	Ex	Idiopathic	0	0	0	0	0	0	0	0	0	0	0	0	0	0	0	0	0	0	0	0	0	0	0	0	0	0	0	0	0	0	0	0
09A	AGAGCAAGAGCA	CCGTCAATTYMTTTRAGT	MID065	CCTACGGGAGGCAGCAG	9	1	A	2010	B	F	63	167.5	46.2	13.791	Severely Underweight	Ex	PostInfection	1	0	0	0	0	0	0	0	1	0	0	0	0	0	0	0	0	0	0	1	0	0	0	0	0	0	0	0	0	0	0	0
09C	AGCCATACTGAC	CCGTCAATTYMTTTRAGT	MID077	CCTACGGGAGGCAGCAG	9	3	C	2011	B	F	63	167.5	46.2	13.791	Severely Underweight	Ex	PostInfection	1	0	0	0	0	0	0	0	1	0	0	0	0	0	0	0	0	0	0	1	0	0	0	0	0	0	0	0	0	0	0	0
09E	AATCAGTCTCGT	CCGTCAATTYMTTTRAGT	MID006	CCTACGGGAGGCAGCAG	9	5	E	2011	B	F	63	167.5	46.2	13.791	Severely Underweight	Ex	PostInfection	1	0	0	0	0	0	0	0	1	0	0	0	0	0	0	0	0	0	0	1	0	0	0	0	0	0	0	0	0	0	0	0
09F	ACAGTGCTTCAT	CCGTCAATTYMTTTRAGT	MID018	CCTACGGGAGGCAGCAG	9	6	F	2011	B	F	63	167.5	46.2	13.791	Severely Underweight	Ex	PostInfection	1	0	0	0	0	0	0	0	1	0	0	0	0	0	0	0	0	0	0	1	0	0	0	0	0	0	0	0	0	0	0	0
09G	ACGACGTCTTAG	CCGTCAATTYMTTTRAGT	MID030	CCTACGGGAGGCAGCAG	9	7	G	2011	B	F	63	167.5	46.2	13.791	Severely Underweight	Ex	PostInfection	1	0	0	0	0	0	0	0	1	0	0	0	0	0	0	0	0	0	0	1	0	0	0	0	0	0	0	0	0	0	0	0
10A	ACGTGAGAGAAT	CCGTCAATTYMTTTRAGT	MID042	CCTACGGGAGGCAGCAG	10	1	A	2010	B	F	71	156	41.4	13.2692	Severely Underweight	Non	Idiopathic	0	0	0	0	0	0	0	0	0	0	0	0	0	0	0	0	0	0	0	0	0	0	0	0	0	0	0	0	0	0	0	0
10B	ACTGACAGCCAT	CCGTCAATTYMTTTRAGT	MID054	CCTACGGGAGGCAGCAG	10	2	B	2011	R	F	71	156	41.4	13.2692	Severely Underweight	Non	Idiopathic	0	0	0	0	0	0	0	0	0	0	0	0	0	0	0	0	0	0	0	0	0	0	0	0	0	0	0	0	0	0	0	0
10C	AGAGTAGCTAAG	CCGTCAATTYMTTTRAGT	MID066	CCTACGGGAGGCAGCAG	10	3	C	2011	R	F	71	156	41.4	13.2692	Severely Underweight	Non	Idiopathic	0	0	0	0	0	0	0	0	0	0	0	0	0	0	0	0	0	0	0	0	0	0	0	0	0	0	0	0	0	0	0	0
10D	AGCGACTGTGCA	CCGTCAATTYMTTTRAGT	MID078	CCTACGGGAGGCAGCAG	10	4	D	2011	B	F	71	156	41.4	13.2692	Severely Underweight	Non	Idiopathic	0	0	0	0	0	0	0	0	0	0	0	0	0	0	0	0	0	0	0	0	0	0	0	0	0	0	0	0	0	0	0	0
10E	AGTACGCTCGAG	CCGTCAATTYMTTTRAGT	MID090	CCTACGGGAGGCAGCAG	10	5	E	2011	B	F	71	156	41.4	13.2692	Severely Underweight	Non	Idiopathic	0	0	0	0	0	0	0	0	0	0	0	0	0	0	0	0	0	0	0	0	0	0	0	0	0	0	0	0	0	0	0	0
10F	AATCGTGACTCG	CCGTCAATTYMTTTRAGT	MID007	CCTACGGGAGGCAGCAG	10	6	F	2011	B	F	71	156	41.4	13.2692	Severely Underweight	Non	Idiopathic	0	0	0	0	0	0	0	0	0	0	0	0	0	0	0	0	0	0	0	0	0	0	0	0	0	0	0	0	0	0	0	0
10G	ACAGTTGCGCGA	CCGTCAATTYMTTTRAGT	MID019	CCTACGGGAGGCAGCAG	10	7	G	2011	B	F	71	156	41.4	13.2692	Severely Underweight	Non	Idiopathic	0	0	0	0	0	0	0	0	0	0	0	0	0	0	0	0	0	0	0	0	0	0	0	0	0	0	0	0	0	0	0	0
12A	ACGAGTGCTATC	CCGTCAATTYMTTTRAGT	MID031	CCTACGGGAGGCAGCAG	12	1	A	2010	B	M	68	180	79.5	22.0833	Normal	Ex	ABPA	0	0	0	0	0	0	0	0	0	0	0	0	0	0	0	0	0	0	0	0	0	0	0	0	0	0	0	0	0	0	0	0
12B	ACGTGCCGTAGA	CCGTCAATTYMTTTRAGT	MID043	CCTACGGGAGGCAGCAG	12	2	B	2011	T	M	68	180	79.5	22.0833	Normal	Ex	ABPA	0	0	0	0	0	0	0	0	0	0	0	0	0	0	0	0	0	0	0	0	0	0	0	0	0	0	0	0	0	0	0	0
12C	ACTGATCCTAGT	CCGTCAATTYMTTTRAGT	MID055	CCTACGGGAGGCAGCAG	12	3	C	2011	B	M	68	180	79.5	22.0833	Normal	Ex	ABPA	0	0	0	0	0	0	0	0	0	0	0	0	0	0	0	0	0	0	0	0	0	0	0	0	0	0	0	0	0	0	0	0
12D	AGAGTCCTGAGC	CCGTCAATTYMTTTRAGT	MID067	CCTACGGGAGGCAGCAG	12	4	D	2011	R	M	68	180	79.5	22.0833	Normal	Ex	ABPA	0	0	0	0	0	0	0	0	0	0	0	0	0	0	0	0	0	0	0	0	0	0	0	0	0	0	0	0	0	0	0	0
12E	AGCGAGCTATCT	CCGTCAATTYMTTTRAGT	MID079	CCTACGGGAGGCAGCAG	12	5	E	2011	B	M	68	180	79.5	22.0833	Normal	Ex	ABPA	0	0	0	0	0	0	0	0	0	0	0	0	0	0	0	0	0	0	0	0	0	0	0	0	0	0	0	0	0	0	0	0
12F	AGTACTGCAGGC	CCGTCAATTYMTTTRAGT	MID091	CCTACGGGAGGCAGCAG	12	6	F	2011	T	M	68	180	79.5	22.0833	Normal	Ex	ABPA	0	0	0	0	0	0	0	0	0	0	0	0	0	0	0	0	0	0	0	0	0	0	0	0	0	0	0	0	0	0	0	0
12G	ACACACTATGGC	CCGTCAATTYMTTTRAGT	MID008	CCTACGGGAGGCAGCAG	12	7	G	2011	B	M	68	180	79.5	22.0833	Normal	Ex	ABPA	0	0	0	0	0	0	0	0	0	0	0	0	0	0	0	0	0	0	0	0	0	0	0	0	0	0	0	0	0	0	0	0
13A	ACATCACTTAGC	CCGTCAATTYMTTTRAGT	MID020	CCTACGGGAGGCAGCAG	13	1	A	2010	B	M	71	165	52.5	15.9091	Severely Underweight	Non	PostInfection	1	0	0	0	0	0	0	0	0	0	0	0	0	0	0	0	1	0	0	0	0	0	0	0	0	0	0	0	0	0	0	0
13B	ACGATGCGACCA	CCGTCAATTYMTTTRAGT	MID032	CCTACGGGAGGCAGCAG	13	2	B	2011	B	M	71	165	52.5	15.9091	Severely Underweight	Non	PostInfection	1	0	0	0	0	0	0	0	0	0	0	0	0	0	0	0	1	0	0	0	0	0	0	0	0	0	0	0	0	0	0	0
13C	ACGTTAGCACAC	CCGTCAATTYMTTTRAGT	MID044	CCTACGGGAGGCAGCAG	13	3	C	2011	B	M	71	165	52.5	15.9091	Severely Underweight	Non	PostInfection	1	0	0	0	0	0	0	0	0	0	0	0	0	0	0	0	1	0	0	0	0	0	0	0	0	0	0	0	0	0	0	0
13D	ACTGTACGCGTA	CCGTCAATTYMTTTRAGT	MID056	CCTACGGGAGGCAGCAG	13	4	D	2011	B	M	71	165	52.5	15.9091	Severely Underweight	Non	PostInfection	1	0	0	0	0	0	0	0	0	0	0	0	0	0	0	0	1	0	0	0	0	0	0	0	0	0	0	0	0	0	0	0
13E	AGATACACGCGC	CCGTCAATTYMTTTRAGT	MID068	CCTACGGGAGGCAGCAG	13	5	E	2011	B	M	71	165	52.5	15.9091	Severely Underweight	Non	PostInfection	1	0	0	0	0	0	0	0	0	0	0	0	0	0	0	0	1	0	0	0	0	0	0	0	0	0	0	0	0	0	0	0
13F	AGCGCTGATGTG	CCGTCAATTYMTTTRAGT	MID080	CCTACGGGAGGCAGCAG	13	6	F	2011	B	M	71	165	52.5	15.9091	Severely Underweight	Non	PostInfection	1	0	0	0	0	0	0	0	0	0	0	0	0	0	0	0	1	0	0	0	0	0	0	0	0	0	0	0	0	0	0	0
13G	AGTAGTATCCTC	CCGTCAATTYMTTTRAGT	MID092	CCTACGGGAGGCAGCAG	13	7	G	2011	R	M	71	165	52.5	15.9091	Severely Underweight	Non	PostInfection	1	0	0	0	0	0	0	0	0	0	0	0	0	0	0	0	1	0	0	0	0	0	0	0	0	0	0	0	0	0	0	0
14A	ACACATGTCTAC	CCGTCAATTYMTTTRAGT	MID009	CCTACGGGAGGCAGCAG	14	1	A	2010	B	M	65	162.2	51.1	15.7522	Severely Underweight	Non	PostInfection	0	0	0	0	0	0	0	0	0	0	0	0	0	0	0	0	0	0	0	0	0	0	0	0	0	0	0	0	0	0	0	0
14B	ACATGATCGTTC	CCGTCAATTYMTTTRAGT	MID021	CCTACGGGAGGCAGCAG	14	2	B	2011	B	M	65	162.2	51.1	15.7522	Severely Underweight	Non	PostInfection	0	0	0	0	0	0	0	0	0	0	0	0	0	0	0	0	0	0	0	0	0	0	0	0	0	0	0	0	0	0	0	0
14C	ACGCAACTGCTA	CCGTCAATTYMTTTRAGT	MID033	CCTACGGGAGGCAGCAG	14	3	C	2011	B	M	65	162.2	51.1	15.7522	Severely Underweight	Non	PostInfection	0	0	0	0	0	0	0	0	0	0	0	0	0	0	0	0	0	0	0	0	0	0	0	0	0	0	0	0	0	0	0	0
14D	ACTACAGCCTAT	CCGTCAATTYMTTTRAGT	MID045	CCTACGGGAGGCAGCAG	14	4	D	2011	B	M	65	162.2	51.1	15.7522	Severely Underweight	Non	PostInfection	0	0	0	0	0	0	0	0	0	0	0	0	0	0	0	0	0	0	0	0	0	0	0	0	0	0	0	0	0	0	0	0
14E	ACTGTCGAAGCT	CCGTCAATTYMTTTRAGT	MID057	CCTACGGGAGGCAGCAG	14	5	E	2011	B	M	65	162.2	51.1	15.7522	Severely Underweight	Non	PostInfection	0	0	0	0	0	0	0	0	0	0	0	0	0	0	0	0	0	0	0	0	0	0	0	0	0	0	0	0	0	0	0	0
14F	AGATCGGCTCGA	CCGTCAATTYMTTTRAGT	MID069	CCTACGGGAGGCAGCAG	14	6	F	2011	B	M	65	162.2	51.1	15.7522	Severely Underweight	Non	PostInfection	0	0	0	0	0	0	0	0	0	0	0	0	0	0	0	0	0	0	0	0	0	0	0	0	0	0	0	0	0	0	0	0
14G	AGCGTAGGTCGT	CCGTCAATTYMTTTRAGT	MID081	CCTACGGGAGGCAGCAG	14	7	G	2011	B	M	65	162.2	51.1	15.7522	Severely Underweight	Non	PostInfection	0	0	0	0	0	0	0	0	0	0	0	0	0	0	0	0	0	0	0	0	0	0	0	0	0	0	0	0	0	0	0	0
15A	AGTCACATCACT	CCGTCAATTYMTTTRAGT	MID093	CCTACGGGAGGCAGCAG	15	1	A	2010	B	M	65	183	72.6	19.8361	Normal	Ex	Idiopathic	1	0	0	0	1	0	0	0	0	1	0	0	0	0	0	0	0	0	0	0	0	0	0	0	0	0	0	0	0	0	0	0
15B	ACACGAGCCACA	CCGTCAATTYMTTTRAGT	MID010	CCTACGGGAGGCAGCAG	15	2	B	2011	B	M	65	183	72.6	19.8361	Normal	Ex	Idiopathic	1	0	0	0	1	0	0	0	0	1	0	0	0	0	0	0	0	0	0	0	0	0	0	0	0	0	0	0	0	0	0	0
15BCe	ACATGTCACGTG	CCGTCAATTYMTTTRAGT	MID022	CCTACGGGAGGCAGCAG	15	3	BCe	2011	E	M	65	183	72.6	19.8361	Normal	Ex	Idiopathic	1	0	0	0	1	0	0	0	0	1	0	0	0	0	0	0	0	0	0	0	0	0	0	0	0	0	0	0	0	0	0	0
15C	ACGCGATACTGG	CCGTCAATTYMTTTRAGT	MID034	CCTACGGGAGGCAGCAG	15	4	C	2011	R	M	65	183	72.6	19.8361	Normal	Ex	Idiopathic	1	0	0	0	1	0	0	0	0	1	0	0	0	0	0	0	0	0	0	0	0	0	0	0	0	0	0	0	0	0	0	0
15D	ACTACGTGTGGT	CCGTCAATTYMTTTRAGT	MID046	CCTACGGGAGGCAGCAG	15	5	D	2011	B	M	65	183	72.6	19.8361	Normal	Ex	Idiopathic	1	0	0	0	1	0	0	0	0	1	0	0	0	0	0	0	0	0	0	0	0	0	0	0	0	0	0	0	0	0	0	0
15E	ACTGTGACTTCA	CCGTCAATTYMTTTRAGT	MID058	CCTACGGGAGGCAGCAG	15	6	E	2011	R	M	65	183	72.6	19.8361	Normal	Ex	Idiopathic	1	0	0	0	1	0	0	0	0	1	0	0	0	0	0	0	0	0	0	0	0	0	0	0	0	0	0	0	0	0	0	0
15F	AGATCTCTGCAT	CCGTCAATTYMTTTRAGT	MID070	CCTACGGGAGGCAGCAG	15	7	F	2011	B	M	65	183	72.6	19.8361	Normal	Ex	Idiopathic	1	0	0	0	0	0	0	0	0	1	0	0	0	0	0	0	0	0	0	0	0	0	0	0	0	0	0	0	0	0	0	0
15G	AGCTATCCACGA	CCGTCAATTYMTTTRAGT	MID082	CCTACGGGAGGCAGCAG	15	8	G	2011	R	M	65	183	72.6	19.8361	Normal	Ex	Idiopathic	1	0	0	0	0	0	0	0	0	1	0	0	0	0	0	0	0	0	0	0	0	0	0	0	0	0	0	0	0	0	0	0
16A	AGTCCATAGCTG	CCGTCAATTYMTTTRAGT	MID094	CCTACGGGAGGCAGCAG	16	1	A	2010	B	M	65	165	62.3	18.8788	Normal	Ex	ABPA	0	0	0	0	0	0	0	0	0	0	0	0	0	0	0	0	0	0	0	0	0	0	0	0	0	0	0	0	0	0	0	0
16B	ACACGGTGTCTA	CCGTCAATTYMTTTRAGT	MID011	CCTACGGGAGGCAGCAG	16	2	B	2011	R	M	65	165	62.3	18.8788	Normal	Ex	ABPA	0	0	0	0	0	0	0	0	0	0	0	0	0	0	0	0	0	0	0	0	0	0	0	0	0	0	0	0	0	0	0	0
16C	ACATTCAGCGCA	CCGTCAATTYMTTTRAGT	MID023	CCTACGGGAGGCAGCAG	16	3	C	2011	B	M	65	165	62.3	18.8788	Normal	Ex	ABPA	0	0	0	0	0	0	0	0	0	0	0	0	0	0	0	0	0	0	0	0	0	0	0	0	0	0	0	0	0	0	0	0
16D	ACGCGCAGATAC	CCGTCAATTYMTTTRAGT	MID035	CCTACGGGAGGCAGCAG	16	4	De	2011	E	M	65	165	62.3	18.8788	Normal	Ex	ABPA	0	0	0	0	0	0	0	0	0	0	0	0	0	0	0	0	0	0	0	0	0	0	0	0	0	0	0	0	0	0	0	0
16E	ACTAGCTCCATA	CCGTCAATTYMTTTRAGT	MID047	CCTACGGGAGGCAGCAG	16	5	E	2011	T	M	65	165	62.3	18.8788	Normal	Ex	ABPA	0	0	0	0	0	0	0	0	0	0	0	0	0	0	0	0	0	0	0	0	0	0	0	0	0	0	0	0	0	0	0	0
16F	ACTTGTAGCAGC	CCGTCAATTYMTTTRAGT	MID059	CCTACGGGAGGCAGCAG	16	6	F	2011	R	M	65	165	62.3	18.8788	Normal	Ex	ABPA	0	0	0	0	0	0	0	0	0	0	0	0	0	0	0	0	0	0	0	0	0	0	0	0	0	0	0	0	0	0	0	0
16G	AGATGTTCTGCT	CCGTCAATTYMTTTRAGT	MID071	CCTACGGGAGGCAGCAG	16	7	G	2011	B	M	65	165	62.3	18.8788	Normal	Ex	ABPA	0	0	0	0	0	0	0	0	0	0	0	0	0	0	0	0	0	0	0	0	0	0	0	0	0	0	0	0	0	0	0	0
17A	AGCTCCATACAG	CCGTCAATTYMTTTRAGT	MID083	CCTACGGGAGGCAGCAG	17	1	A	2010	B	F	73	154.5	36.8	11.9094	Severely Underweight	Ex	PostInfection	1	0	0	0	0	0	0	0	1	0	0	0	1	0	0	0	0	0	0	0	0	1	0	0	0	0	0	0	0	0	0	0
17B	AGTCTACTCTGA	CCGTCAATTYMTTTRAGT	MID095	CCTACGGGAGGCAGCAG	17	2	B	2011	B	F	73	154.5	36.8	11.9094	Severely Underweight	Ex	PostInfection	0	0	0	0	0	0	0	0	0	0	0	0	0	0	0	0	0	0	0	0	0	0	0	0	0	0	0	0	0	0	0	0
17C	ACACTAGATCCG	CCGTCAATTYMTTTRAGT	MID012	CCTACGGGAGGCAGCAG	17	3	C	2011	B	F	73	154.5	36.8	11.9094	Severely Underweight	Ex	PostInfection	0	0	0	0	0	0	0	0	0	0	0	0	0	0	0	0	0	0	0	0	0	0	0	0	0	0	0	0	0	0	0	0
17D	ACCACATACATC	CCGTCAATTYMTTTRAGT	MID024	CCTACGGGAGGCAGCAG	17	4	D	2011	B	F	73	154.5	36.8	11.9094	Severely Underweight	Ex	PostInfection	0	0	0	0	0	0	0	0	0	0	0	0	0	0	0	0	0	0	0	0	0	0	0	0	0	0	0	0	0	0	0	0
17E	ACGCTATCTGGA	CCGTCAATTYMTTTRAGT	MID036	CCTACGGGAGGCAGCAG	17	5	E	2011	T	F	73	154.5	36.8	11.9094	Severely Underweight	Ex	PostInfection	0	0	0	0	0	0	0	0	0	0	0	0	0	0	0	0	0	0	0	0	0	0	0	0	0	0	0	0	0	0	0	0
17F	ACTATTGTCACG	CCGTCAATTYMTTTRAGT	MID048	CCTACGGGAGGCAGCAG	17	6	F	2011	T	F	73	154.5	36.8	11.9094	Severely Underweight	Ex	PostInfection	0	0	0	0	0	0	0	0	0	0	0	0	0	0	0	0	0	0	0	0	0	0	0	0	0	0	0	0	0	0	0	0
17G	AGAACACGTCTC	CCGTCAATTYMTTTRAGT	MID060	CCTACGGGAGGCAGCAG	17	7	G	2011	B	F	73	154.5	36.8	11.9094	Severely Underweight	Ex	PostInfection	0	0	0	0	0	0	0	0	0	0	0	0	0	0	0	0	0	0	0	0	0	0	0	0	0	0	0	0	0	0	0	0
18A	AGCACACCTACA	CCGTCAATTYMTTTRAGT	MID072	CCTACGGGAGGCAGCAG	18	1	A	2010	B	M	77	168	67	19.9405	Normal	Ex	PostInfection	1	0	0	0	0	0	0	0	0	1	0	0	0	0	0	0	0	0	0	0	0	0	0	0	0	0	0	0	0	0	0	0
19A	AGCTCTCAGAGG	CCGTCAATTYMTTTRAGT	MID084	CCTACGGGAGGCAGCAG	19	1	A	2010	B	M	40	177	97.7	27.5989	Overweight	Non	Idiopathic	0	0	0	0	0	0	0	0	0	0	0	0	0	0	0	0	0	0	0	0	0	0	0	0	0	0	0	0	0	0	0	0
19B	AGTGAGAGAAGC	CCGTCAATTYMTTTRAGT	MID097	CCTACGGGAGGCAGCAG	19	2	B	2011	R	M	40	177	97.7	27.5989	Overweight	Non	Idiopathic	0	0	0	0	0	0	0	0	0	0	0	0	0	0	0	0	0	0	0	0	0	0	0	0	0	0	0	0	0	0	0	0
20A	ATACTATTGCGC	CCGTCAATTYMTTTRAGT	MID109	CCTACGGGAGGCAGCAG	20	1	A	2010	B	F	59	163	57.4	17.6074	Underweight	Non	Idiopathic	0	0	0	0	0	0	0	0	0	0	0	0	0	0	0	0	0	0	0	0	0	0	0	0	0	0	0	0	0	0	0	0
20B	ATCGCGGACGAT	CCGTCAATTYMTTTRAGT	MID121	CCTACGGGAGGCAGCAG	20	2	B	2011	B	F	59	163	57.4	17.6074	Underweight	Non	Idiopathic	0	0	0	0	0	0	0	0	0	0	0	0	0	0	0	0	0	0	0	0	0	0	0	0	0	0	0	0	0	0	0	0
21A	ATGCACTGGCGA	CCGTCAATTYMTTTRAGT	MID133	CCTACGGGAGGCAGCAG	21	1	A	2010	B	F	62	168	63	18.75	Normal	NA	PostInfection	1	0	0	0	1	0	0	0	0	0	0	0	0	0	0	0	0	0	0	0	0	0	0	0	0	0	0	0	0	0	0	0
21B	ATTATCGTGCAC	CCGTCAATTYMTTTRAGT	MID145	CCTACGGGAGGCAGCAG	21	2	B	2011	B	F	62	168	63	18.75	Normal	NA	PostInfection	1	0	0	0	1	0	0	0	0	0	0	0	0	0	0	0	0	0	0	0	0	0	0	0	0	0	0	0	0	0	0	0
21C	CACGACAGGCTA	CCGTCAATTYMTTTRAGT	MID157	CCTACGGGAGGCAGCAG	21	3	C	2011	B	F	62	168	63	18.75	Normal	NA	PostInfection	1	0	0	0	1	0	0	0	0	0	0	0	0	0	0	0	0	0	0	0	0	0	0	0	0	0	0	0	0	0	0	0
21D	CAGATACACTTC	CCGTCAATTYMTTTRAGT	MID169	CCTACGGGAGGCAGCAG	21	4	D	2011	B	F	62	168	63	18.75	Normal	NA	PostInfection	1	0	0	0	1	0	0	0	0	0	0	0	0	0	0	0	0	0	0	0	0	0	0	0	0	0	0	0	0	0	0	0
21E	CAGTGTCAGGAC	CCGTCAATTYMTTTRAGT	MID181	CCTACGGGAGGCAGCAG	21	5	E	2011	B	F	62	168	63	18.75	Normal	NA	PostInfection	1	0	0	0	1	0	0	0	0	0	0	0	0	0	0	0	0	0	0	0	0	0	0	0	0	0	0	0	0	0	0	0
21F	AGTGCGATGCGT	CCGTCAATTYMTTTRAGT	MID098	CCTACGGGAGGCAGCAG	21	6	F	2011	B	F	62	168	63	18.75	Normal	NA	PostInfection	0	0	0	0	0	0	0	0	0	0	0	0	0	0	0	0	0	0	0	0	0	0	0	0	0	0	0	0	0	0	0	0
21G	ATACTCACTCAG	CCGTCAATTYMTTTRAGT	MID110	CCTACGGGAGGCAGCAG	21	7	G	2011	B	F	62	168	63	18.75	Normal	NA	PostInfection	0	0	0	0	0	0	0	0	0	0	0	0	0	0	0	0	0	0	0	0	0	0	0	0	0	0	0	0	0	0	0	0
22A	ATCGCTCGAGGA	CCGTCAATTYMTTTRAGT	MID122	CCTACGGGAGGCAGCAG	22	1	Ae	2010	T	M	71	192	88.6	23.0729	Normal	Non	Idiopathic	0	0	0	0	0	0	0	0	0	0	0	0	0	0	0	0	0	0	0	0	0	0	0	0	0	0	0	0	0	0	0	0
22B	ATGCAGCTCAGT	CCGTCAATTYMTTTRAGT	MID134	CCTACGGGAGGCAGCAG	22	2	B	2011	R	M	71	192	88.6	23.0729	Normal	Non	Idiopathic	0	0	0	0	0	0	0	0	0	0	0	0	0	0	0	0	0	0	0	0	0	0	0	0	0	0	0	0	0	0	0	0
22C	ATTCTGTGAGCG	CCGTCAATTYMTTTRAGT	MID146	CCTACGGGAGGCAGCAG	22	3	C	2011	T	M	71	192	88.6	23.0729	Normal	Non	Idiopathic	0	0	0	0	0	0	0	0	0	0	0	0	0	0	0	0	0	0	0	0	0	0	0	0	0	0	0	0	0	0	0	0
22D	CACGGACTATAC	CCGTCAATTYMTTTRAGT	MID158	CCTACGGGAGGCAGCAG	22	4	D	2011	R	M	71	192	88.6	23.0729	Normal	Non	Idiopathic	0	0	0	0	0	0	0	0	0	0	0	0	0	0	0	0	0	0	0	0	0	0	0	0	0	0	0	0	0	0	0	0
22E	CAGATCGGATCG	CCGTCAATTYMTTTRAGT	MID170	CCTACGGGAGGCAGCAG	22	5	Ee	2011	E	M	71	192	88.6	23.0729	Normal	Non	Idiopathic	0	0	0	0	0	0	0	0	0	0	0	0	0	0	0	0	0	0	0	0	0	0	0	0	0	0	0	0	0	0	0	0
22F	CATACCAGTAGC	CCGTCAATTYMTTTRAGT	MID182	CCTACGGGAGGCAGCAG	22	6	Fe	2011	E	M	71	192	88.6	23.0729	Normal	Non	Idiopathic	0	0	0	0	0	0	0	0	0	0	0	0	0	0	0	0	0	0	0	0	0	0	0	0	0	0	0	0	0	0	0	0
22G	AGTGGATGCTCT	CCGTCAATTYMTTTRAGT	MID099	CCTACGGGAGGCAGCAG	22	7	G	2011	B	M	71	192	88.6	23.0729	Normal	Non	Idiopathic	0	0	0	0	0	0	0	0	0	0	0	0	0	0	0	0	0	0	0	0	0	0	0	0	0	0	0	0	0	0	0	0
23A	ATAGCTCCATAC	CCGTCAATTYMTTTRAGT	MID111	CCTACGGGAGGCAGCAG	23	1	A	2010	B	M	31	173	69.3	20.0289	Normal	NA	PCD	0	0	0	0	0	0	0	0	0	0	0	0	0	0	0	0	0	0	0	0	0	0	0	0	0	0	0	0	0	0	0	0
24A	ATCGTACAACTC	CCGTCAATTYMTTTRAGT	MID123	CCTACGGGAGGCAGCAG	24	1	A	2010	B	M	60	177	73.1	20.6497	Normal	Non	Other	1	0	0	0	0	0	0	0	0	1	0	0	0	0	0	0	0	0	0	0	0	0	0	0	0	0	0	0	0	0	0	0
24Be	ATGCCTGAGCAG	CCGTCAATTYMTTTRAGT	MID135	CCTACGGGAGGCAGCAG	24	2	Be	2011	E	M	60	177	73.1	20.6497	Normal	Non	Other	1	0	0	0	1	0	0	0	0	1	0	0	0	0	0	0	0	0	0	0	0	0	0	0	0	0	0	0	0	0	0	0
24C	CAACACGCACGA	CCGTCAATTYMTTTRAGT	MID147	CCTACGGGAGGCAGCAG	24	3	C	2011	B	M	60	177	73.1	20.6497	Normal	Non	Other	1	0	0	0	1	0	0	0	0	1	0	0	0	1	0	0	0	0	0	0	0	0	0	0	0	0	0	0	0	0	0	0
24D	CACGTCGATGGA	CCGTCAATTYMTTTRAGT	MID159	CCTACGGGAGGCAGCAG	24	4	D	2011	B	M	60	177	73.1	20.6497	Normal	Non	Other	1	0	0	0	1	0	0	0	0	1	0	0	0	1	0	0	0	0	0	0	0	0	0	0	0	0	0	0	0	0	0	0
24E	CAGCACTAAGCG	CCGTCAATTYMTTTRAGT	MID171	CCTACGGGAGGCAGCAG	24	5	E	2011	T	M	60	177	73.1	20.6497	Normal	Non	Other	1	0	0	0	1	0	0	0	0	1	0	0	0	1	0	0	0	0	0	0	0	0	0	0	0	0	0	0	0	0	0	0
24F	CATAGACGTTCG	CCGTCAATTYMTTTRAGT	MID183	CCTACGGGAGGCAGCAG	24	6	F	2011	B	M	60	177	73.1	20.6497	Normal	Non	Other	1	0	0	0	1	0	0	0	0	1	0	0	0	1	0	0	0	0	0	0	0	0	0	0	0	0	0	0	0	0	0	0
24G	AGTGTCACGGTG	CCGTCAATTYMTTTRAGT	MID100	CCTACGGGAGGCAGCAG	24	7	G	2011	B	M	60	177	73.1	20.6497	Normal	Non	Other	1	0	0	0	1	0	0	0	0	1	0	0	0	1	0	0	0	0	0	0	0	0	0	0	0	0	0	0	0	0	0	0
25A	ATAGGCGATCTC	CCGTCAATTYMTTTRAGT	MID112	CCTACGGGAGGCAGCAG	25	1	A	2010	B	M	75	173.5	86.6	24.9568	Normal	Non	Idiopathic	0	0	0	0	0	0	0	0	0	0	0	0	0	0	0	0	0	0	0	0	0	0	0	0	0	0	0	0	0	0	0	0
25B	ATCTACTACACG	CCGTCAATTYMTTTRAGT	MID124	CCTACGGGAGGCAGCAG	25	2	B	2011	B	M	75	173.5	86.6	24.9568	Normal	Non	Idiopathic	0	0	0	0	0	0	0	0	0	0	0	0	0	0	0	0	0	0	0	0	0	0	0	0	0	0	0	0	0	0	0	0
25C	ATGCGTAGTGCG	CCGTCAATTYMTTTRAGT	MID136	CCTACGGGAGGCAGCAG	25	3	C	2011	B	M	75	173.5	86.6	24.9568	Normal	Non	Idiopathic	0	0	0	0	0	0	0	0	0	0	0	0	0	0	0	0	0	0	0	0	0	0	0	0	0	0	0	0	0	0	0	0
25D	CAACTATCAGCT	CCGTCAATTYMTTTRAGT	MID148	CCTACGGGAGGCAGCAG	25	4	D	2011	B	M	75	173.5	86.6	24.9568	Normal	Non	Idiopathic	0	0	0	0	0	0	0	0	0	0	0	0	0	0	0	0	0	0	0	0	0	0	0	0	0	0	0	0	0	0	0	0
25E	CACGTGACATGT	CCGTCAATTYMTTTRAGT	MID160	CCTACGGGAGGCAGCAG	25	5	E	2011	B	M	75	173.5	86.6	24.9568	Normal	Non	Idiopathic	0	0	0	0	0	0	0	0	0	0	0	0	0	0	0	0	0	0	0	0	0	0	0	0	0	0	0	0	0	0	0	0
25F	CAGCATGTGTTG	CCGTCAATTYMTTTRAGT	MID172	CCTACGGGAGGCAGCAG	25	6	F	2011	B	M	75	173.5	86.6	24.9568	Normal	Non	Idiopathic	0	0	0	0	0	0	0	0	0	0	0	0	0	0	0	0	0	0	0	0	0	0	0	0	0	0	0	0	0	0	0	0
25G	CATAGCGAGTTC	CCGTCAATTYMTTTRAGT	MID184	CCTACGGGAGGCAGCAG	25	7	G	2011	B	M	75	173.5	86.6	24.9568	Normal	Non	Idiopathic	0	0	0	0	0	0	0	0	0	0	0	0	0	0	0	0	0	0	0	0	0	0	0	0	0	0	0	0	0	0	0	0
26A	AGTGTTCGATCG	CCGTCAATTYMTTTRAGT	MID101	CCTACGGGAGGCAGCAG	26	1	A	2011	B	F	77	156	55	17.6282	Underweight	Non	Idiopathic	0	0	0	0	0	0	0	0	0	0	0	0	0	0	0	0	0	0	0	0	0	0	0	0	0	0	0	0	0	0	0	0
26C	ATATCGCTACTG	CCGTCAATTYMTTTRAGT	MID113	CCTACGGGAGGCAGCAG	26	3	C	2011	B	F	77	156	55	17.6282	Underweight	Non	Idiopathic	0	0	0	0	0	0	0	0	0	0	0	0	0	0	0	0	0	0	0	0	0	0	0	0	0	0	0	0	0	0	0	0
26D	ATCTCTGGCATA	CCGTCAATTYMTTTRAGT	MID125	CCTACGGGAGGCAGCAG	26	4	D	2011	R	F	77	156	55	17.6282	Underweight	Non	Idiopathic	0	0	0	0	0	0	0	0	0	0	0	0	0	0	0	0	0	0	0	0	0	0	0	0	0	0	0	0	0	0	0	0
26E	ATGGATACGCTC	CCGTCAATTYMTTTRAGT	MID137	CCTACGGGAGGCAGCAG	26	5	E	2011	B	F	77	156	55	17.6282	Underweight	Non	Idiopathic	0	0	0	0	0	0	0	0	0	0	0	0	0	0	0	0	0	0	0	0	0	0	0	0	0	0	0	0	0	0	0	0
26F	CAACTCATCGTA	CCGTCAATTYMTTTRAGT	MID149	CCTACGGGAGGCAGCAG	26	6	F	2011	R	F	77	156	55	17.6282	Underweight	Non	Idiopathic	0	0	0	0	0	0	0	0	0	0	0	0	0	0	0	0	0	0	0	0	0	0	0	0	0	0	0	0	0	0	0	0
26G	CACTACTGTTGA	CCGTCAATTYMTTTRAGT	MID161	CCTACGGGAGGCAGCAG	26	7	G	2012	B	F	77	156	55	17.6282	Underweight	Non	Idiopathic	0	0	0	0	0	0	0	0	0	0	0	0	0	0	0	0	0	0	0	0	0	0	0	0	0	0	0	0	0	0	0	0
27A	CAGCGGTGACAT	CCGTCAATTYMTTTRAGT	MID173	CCTACGGGAGGCAGCAG	27	1	A	2011	B	F	57	153	68	22.2222	Normal	Non	ABPA	1	0	0	0	1	0	0	0	0	0	0	0	0	0	0	0	0	0	0	0	0	0	0	0	0	0	0	0	0	0	0	0
27B	CATATACTCGCA	CCGTCAATTYMTTTRAGT	MID185	CCTACGGGAGGCAGCAG	27	2	Be	2011	T	F	57	153	68	22.2222	Normal	Non	ABPA	1	0	0	0	1	0	0	0	0	0	0	0	0	0	0	0	0	0	0	0	0	0	0	0	0	0	0	0	0	0	0	0
27C	AGTTAGTGCGTC	CCGTCAATTYMTTTRAGT	MID102	CCTACGGGAGGCAGCAG	27	3	C	2011	B	F	57	153	68	22.2222	Normal	Non	ABPA	1	0	0	0	1	0	0	0	0	0	0	0	0	0	0	0	0	0	0	0	0	0	0	0	0	0	0	0	0	0	0	0
27D	ATATGCCAGTGC	CCGTCAATTYMTTTRAGT	MID114	CCTACGGGAGGCAGCAG	27	4	D	2011	R	F	57	153	68	22.2222	Normal	Non	ABPA	1	0	0	0	0	0	0	0	0	0	0	1	0	0	0	0	0	0	0	0	0	0	0	0	0	0	0	0	0	0	0	0
27E	ATCTGAGCTGGT	CCGTCAATTYMTTTRAGT	MID126	CCTACGGGAGGCAGCAG	27	5	Ee	2011	E	F	57	153	68	22.2222	Normal	Non	ABPA	1	0	0	0	0	0	0	0	0	0	0	1	0	0	0	0	0	0	0	0	0	0	0	0	0	0	0	0	0	0	0	0
27F	ATGGCAGCTCTA	CCGTCAATTYMTTTRAGT	MID138	CCTACGGGAGGCAGCAG	27	6	F	2011	R	F	57	153	68	22.2222	Normal	Non	ABPA	1	0	0	0	1	0	0	0	0	0	0	0	0	0	0	0	0	0	0	0	0	0	0	0	0	0	0	0	0	0	0	0
27G	CAAGATCGACTC	CCGTCAATTYMTTTRAGT	MID150	CCTACGGGAGGCAGCAG	27	7	G	2011	T	F	57	153	68	22.2222	Normal	Non	ABPA	1	0	0	0	1	0	0	0	0	0	0	0	0	0	0	0	0	0	0	0	0	0	0	0	0	0	0	0	0	0	0	0
28A	CACTCAACAGAC	CCGTCAATTYMTTTRAGT	MID162	CCTACGGGAGGCAGCAG	28	1	A	2011	B	F	64	165	73.5	22.2727	Normal	Ex	Idiopathic	0	0	0	0	0	0	0	0	0	0	0	0	0	0	0	0	0	0	0	0	0	0	0	0	0	0	0	0	0	0	0	0
28B	CAGCTAGAACGC	CCGTCAATTYMTTTRAGT	MID174	CCTACGGGAGGCAGCAG	28	2	B	2011	B	F	64	165	73.5	22.2727	Normal	Ex	Idiopathic	0	0	0	0	0	0	0	0	0	0	0	0	0	0	0	0	0	0	0	0	0	0	0	0	0	0	0	0	0	0	0	0
28C	CATATCGCAGTT	CCGTCAATTYMTTTRAGT	MID186	CCTACGGGAGGCAGCAG	28	3	C	2011	B	F	64	165	73.5	22.2727	Normal	Ex	Idiopathic	0	0	0	0	0	0	0	0	0	0	0	0	0	0	0	0	0	0	0	0	0	0	0	0	1	0	0	0	0	0	1	0
28D	AGTTCAGACGCT	CCGTCAATTYMTTTRAGT	MID103	CCTACGGGAGGCAGCAG	28	4	D	2011	B	F	64	165	73.5	22.2727	Normal	Ex	Idiopathic	0	0	0	0	0	0	0	0	0	0	0	0	0	0	0	0	0	0	0	0	0	0	0	0	0	0	0	0	0	0	0	0
28E	ATCACGTAGCGG	CCGTCAATTYMTTTRAGT	MID115	CCTACGGGAGGCAGCAG	28	5	E	2011	B	F	64	165	73.5	22.2727	Normal	Ex	Idiopathic	0	0	0	0	0	0	0	0	0	0	0	0	0	0	0	0	0	0	0	0	0	0	0	0	1	0	1	0	0	0	0	0
28F	ATCTGGTGCTAT	CCGTCAATTYMTTTRAGT	MID127	CCTACGGGAGGCAGCAG	28	6	F	2011	B	F	64	165	73.5	22.2727	Normal	Ex	Idiopathic	0	0	0	0	0	0	0	0	0	0	0	0	0	0	0	0	0	0	0	0	0	0	0	0	1	0	0	0	1	0	0	0
28G	ATGGCGTGCACA	CCGTCAATTYMTTTRAGT	MID139	CCTACGGGAGGCAGCAG	28	7	G	2011	B	F	64	165	73.5	22.2727	Normal	Ex	Idiopathic	0	0	0	0	0	0	0	0	0	0	0	0	0	0	0	0	0	0	0	0	0	0	0	0	0	0	0	0	0	0	0	0
29A	CAAGTGAGAGAG	CCGTCAATTYMTTTRAGT	MID151	CCTACGGGAGGCAGCAG	29	1	A	2011	B	F	31	153	37	12.0915	Severely Underweight	Non	PostInfection	0	0	0	0	0	0	0	0	0	0	0	0	0	0	0	0	0	0	0	0	0	0	0	0	0	0	0	0	0	0	0	0
30A	CACTCTGATTAG	CCGTCAATTYMTTTRAGT	MID163	CCTACGGGAGGCAGCAG	30	1	A	2011	B	F	50	161	72.6	22.5466	Normal	Ex	Idiopathic	1	0	0	0	1	0	0	0	0	0	0	0	0	0	0	0	0	0	0	0	0	0	0	0	0	0	0	0	0	0	0	0
31A	CAGGTGCTACTA	CCGTCAATTYMTTTRAGT	MID175	CCTACGGGAGGCAGCAG	31	1	Ae	2011	E	F	73	161	71.5	22.205	Normal	Non	Idiopathic	1	0	0	0	1	0	0	0	0	0	0	0	0	0	0	0	0	0	0	0	0	0	0	0	0	0	0	0	0	0	0	0
31B	CATCAGCGTGTA	CCGTCAATTYMTTTRAGT	MID187	CCTACGGGAGGCAGCAG	31	2	B	2011	R	F	73	161	71.5	22.205	Normal	Non	Idiopathic	0	0	0	0	0	0	0	0	0	0	0	0	0	0	0	0	0	0	0	0	0	0	0	0	0	0	0	0	0	0	0	0
31C	AGTTCTACGTCA	CCGTCAATTYMTTTRAGT	MID104	CCTACGGGAGGCAGCAG	31	3	Ce	2011	E	F	73	161	71.5	22.205	Normal	Non	Idiopathic	0	0	0	0	0	0	0	0	0	0	0	0	0	0	0	0	0	0	0	0	0	0	0	0	0	0	0	0	0	0	0	0
31D	ATCACTAGTCAC	CCGTCAATTYMTTTRAGT	MID116	CCTACGGGAGGCAGCAG	31	4	D	2011	R	F	73	161	71.5	22.205	Normal	Non	Idiopathic	0	0	0	0	0	0	0	0	0	0	0	0	0	0	0	0	0	0	0	0	0	0	0	0	0	0	0	0	0	0	0	0
31E	ATCTTAGACTGC	CCGTCAATTYMTTTRAGT	MID128	CCTACGGGAGGCAGCAG	31	5	Ee	2011	E	F	73	161	71.5	22.205	Normal	Non	Idiopathic	0	0	0	0	0	0	0	0	0	0	0	0	0	0	0	0	0	0	0	0	0	0	0	0	0	0	0	0	0	0	0	0
31F	ATGGTCTACTAC	CCGTCAATTYMTTTRAGT	MID140	CCTACGGGAGGCAGCAG	31	6	F	2011	R	F	73	161	71.5	22.205	Normal	Non	Idiopathic	0	0	0	0	0	0	0	0	0	0	0	0	0	0	0	0	0	0	0	0	0	0	0	0	1	0	0	0	1	0	0	0
31G	CACACGTGAGCA	CCGTCAATTYMTTTRAGT	MID152	CCTACGGGAGGCAGCAG	31	7	G	2011	R	F	73	161	71.5	22.205	Normal	Non	Idiopathic	0	0	0	0	0	0	0	0	0	0	0	0	0	0	0	0	0	0	0	0	0	0	0	0	0	0	0	0	0	0	0	0
32A	TACCGCTAGTAG	CCGTCAATTYMTTTRAGT	MID455	CCTACGGGAGGCAGCAG	32	1	A	2011	B	M	59	178	79.1	22.2191	Normal	Non	Idiopathic	1	0	0	0	0	0	0	0	0	1	0	0	0	0	0	0	0	0	0	0	0	0	0	0	0	0	0	0	0	0	0	0
32B	TAGAGAGAGTGG	CCGTCAATTYMTTTRAGT	MID467	CCTACGGGAGGCAGCAG	32	2	B	2011	B	M	59	178	79.1	22.2191	Normal	Non	Idiopathic	1	0	0	0	0	0	0	0	0	1	0	0	0	0	0	0	0	0	0	0	0	0	0	0	0	0	0	0	0	0	0	0
32C	CACTGGTATATC	CCGTCAATTYMTTTRAGT	MID164	CCTACGGGAGGCAGCAG	32	3	C	2011	R	M	59	178	79.1	22.2191	Normal	Non	Idiopathic	1	0	0	0	0	0	0	0	0	1	0	0	0	0	0	0	0	0	0	0	0	0	0	0	0	0	0	0	0	0	0	0
32D	CAGTACGATCTT	CCGTCAATTYMTTTRAGT	MID176	CCTACGGGAGGCAGCAG	32	4	D	2011	B	M	59	178	79.1	22.2191	Normal	Non	Idiopathic	1	0	0	0	0	0	0	0	0	1	0	0	0	0	0	0	0	0	0	0	0	0	0	0	0	0	0	0	0	0	0	0
32E	CATCATGAGGCT	CCGTCAATTYMTTTRAGT	MID188	CCTACGGGAGGCAGCAG	32	5	E	2011	R	M	59	178	79.1	22.2191	Normal	Non	Idiopathic	1	0	0	0	0	0	0	0	0	1	0	0	0	0	0	0	0	0	0	0	0	0	0	0	1	0	0	0	0	0	0	0
32F	ATAATCTCGTCG	CCGTCAATTYMTTTRAGT	MID105	CCTACGGGAGGCAGCAG	32	6	F	2011	B	M	59	178	79.1	22.2191	Normal	Non	Idiopathic	1	0	0	0	0	0	0	0	0	1	0	0	0	0	0	0	0	0	0	0	0	0	0	0	0	0	0	0	0	0	0	0
32G	ATCAGGCGTGTG	CCGTCAATTYMTTTRAGT	MID117	CCTACGGGAGGCAGCAG	32	7	G	2011	B	M	59	178	79.1	22.2191	Normal	Non	Idiopathic	1	0	0	0	0	0	0	0	0	1	0	0	0	0	0	0	0	0	0	0	0	0	0	0	0	0	0	0	0	0	0	0
33A	ATGACCATCGTG	CCGTCAATTYMTTTRAGT	MID129	CCTACGGGAGGCAGCAG	33	1	Ae	2011	E	M	43	176	67.7	19.233	Normal	Ex	Idiopathic	0	0	0	0	0	0	0	0	0	0	0	0	0	0	0	0	0	0	0	0	0	0	0	0	0	0	0	0	0	0	0	0
33B	ATGTACGGCGAC	CCGTCAATTYMTTTRAGT	MID141	CCTACGGGAGGCAGCAG	33	2	B	2011	R	M	43	176	67.7	19.233	Normal	Ex	Idiopathic	0	0	0	0	0	0	0	0	0	0	0	0	0	0	0	0	0	0	0	0	0	0	0	0	0	0	0	0	0	0	0	0
33C	CACAGCTCGAAT	CCGTCAATTYMTTTRAGT	MID153	CCTACGGGAGGCAGCAG	33	3	C	2011	B	M	43	176	67.7	19.233	Normal	Ex	Idiopathic	1	0	0	0	0	0	0	0	0	0	0	1	0	0	0	0	0	0	0	0	0	0	0	0	0	0	0	0	0	0	0	0
33D	CACTGTAGGACG	CCGTCAATTYMTTTRAGT	MID165	CCTACGGGAGGCAGCAG	33	4	D	2011	B	M	43	176	67.7	19.233	Normal	Ex	Idiopathic	1	0	0	0	0	0	0	0	0	0	0	1	0	0	0	0	0	0	0	0	0	0	0	0	0	0	0	0	0	0	0	0
33E	CAGTCACTAACG	CCGTCAATTYMTTTRAGT	MID177	CCTACGGGAGGCAGCAG	33	5	E	2011	B	M	43	176	67.7	19.233	Normal	Ex	Idiopathic	1	0	0	0	0	0	0	0	0	0	0	1	0	0	0	0	0	0	0	0	0	0	0	0	0	0	0	0	0	0	0	0
33F	CATCGTATCAAC	CCGTCAATTYMTTTRAGT	MID189	CCTACGGGAGGCAGCAG	33	6	F	2011	B	M	43	176	67.7	19.233	Normal	Ex	Idiopathic	1	0	0	0	0	0	0	0	0	0	0	1	0	0	0	0	0	0	0	0	0	0	0	0	0	0	0	0	0	0	0	0
33G	ATACACGTGGCG	CCGTCAATTYMTTTRAGT	MID106	CCTACGGGAGGCAGCAG	33	7	G	2011	R	M	43	176	67.7	19.233	Normal	Ex	Idiopathic	1	0	0	0	0	0	0	0	0	0	0	1	0	0	0	0	0	0	0	0	0	0	0	0	0	0	0	0	0	0	0	0
35A	TAGTGCTGCGTA	CCGTCAATTYMTTTRAGT	MID479	CCTACGGGAGGCAGCAG	35	1	A	2011	B	F	40	166	62.9	18.9458	Normal	Smoker	PCD	0	0	0	0	0	0	0	0	0	0	0	0	0	0	0	0	0	0	0	0	0	0	0	0	0	0	0	0	0	0	0	0
36A	ATCCGATCACAG	CCGTCAATTYMTTTRAGT	MID118	CCTACGGGAGGCAGCAG	36	2	A	2011	B	F	59	164	68.5	20.8841	Normal	Non	PCD	1	0	0	0	1	0	0	0	0	1	0	0	0	0	0	0	0	0	0	0	0	0	0	0	0	0	0	0	0	0	0	0
36B	ATGACTCATTCG	CCGTCAATTYMTTTRAGT	MID130	CCTACGGGAGGCAGCAG	36	3	B	2011	B	F	59	164	68.5	20.8841	Normal	Non	PCD	1	0	0	0	1	0	0	0	0	1	0	0	0	0	0	0	0	0	0	0	0	0	0	0	0	0	0	0	0	0	0	0
36C	ATGTCACCGTGA	CCGTCAATTYMTTTRAGT	MID142	CCTACGGGAGGCAGCAG	36	4	C	2011	R	F	59	164	68.5	20.8841	Normal	Non	PCD	1	0	0	0	1	0	0	0	0	1	0	0	0	0	0	0	0	0	0	0	0	0	0	0	0	0	0	0	0	0	0	0
36D	CACAGTGGACGT	CCGTCAATTYMTTTRAGT	MID154	CCTACGGGAGGCAGCAG	36	5	D	2011	B	F	59	164	68.5	20.8841	Normal	Non	PCD	1	0	0	0	1	0	0	0	0	1	0	0	0	0	0	0	0	0	0	0	0	0	0	0	0	0	0	0	0	0	0	0
36E	CAGACATTGCGT	CCGTCAATTYMTTTRAGT	MID166	CCTACGGGAGGCAGCAG	36	6	E	2011	B	F	59	164	68.5	20.8841	Normal	Non	PCD	1	0	0	0	1	0	0	0	0	1	0	0	0	0	0	0	0	0	0	0	0	0	0	0	0	0	0	0	0	0	0	0
36F	CAGTCGAAGCTG	CCGTCAATTYMTTTRAGT	MID178	CCTACGGGAGGCAGCAG	36	7	F	2011	R	F	59	164	68.5	20.8841	Normal	Non	PCD	1	0	0	0	1	0	0	0	0	1	0	0	0	0	0	0	0	0	0	0	0	0	0	0	0	0	0	0	0	0	0	0
36G	CATCTGTAGCGA	CCGTCAATTYMTTTRAGT	MID190	CCTACGGGAGGCAGCAG	36	8	G	2011	B	F	59	164	68.5	20.8841	Normal	Non	PCD	1	0	0	0	1	0	0	0	0	0	0	0	0	0	0	0	0	0	0	0	0	0	0	0	1	0	0	1	0	0	0	0
37A	ATACAGAGCTCC	CCGTCAATTYMTTTRAGT	MID107	CCTACGGGAGGCAGCAG	37	1	Ae	2011	E	M	53	169	56.2	16.6272	Underweight	Ex	Idiopathic	0	0	0	0	0	0	0	0	0	0	0	0	0	0	0	0	0	0	0	0	0	0	0	0	0	0	0	0	0	0	0	0
37B	ATCCTCAGTAGT	CCGTCAATTYMTTTRAGT	MID119	CCTACGGGAGGCAGCAG	37	2	B	2011	R	M	53	169	56.2	16.6272	Underweight	Ex	Idiopathic	0	0	0	0	0	0	0	0	0	0	0	0	0	0	0	0	0	0	0	0	0	0	0	0	0	0	0	0	0	0	0	0
38A	ATGAGACTCCAC	CCGTCAATTYMTTTRAGT	MID131	CCTACGGGAGGCAGCAG	38	1	A	2011	B	F	22	158	47	14.8734	Severely Underweight	Non	PCD	0	0	0	0	0	0	0	0	0	0	0	0	0	0	0	0	0	0	0	0	0	0	0	0	0	0	0	0	0	0	0	0
38B	ATGTGCACGACT	CCGTCAATTYMTTTRAGT	MID143	CCTACGGGAGGCAGCAG	38	2	B	2011	R	F	22	158	47	14.8734	Severely Underweight	Non	PCD	0	0	0	0	0	0	0	0	0	0	0	0	0	0	0	0	0	0	0	0	0	0	0	0	0	0	0	0	0	0	0	0
38C	CACATCTAACAC	CCGTCAATTYMTTTRAGT	MID155	CCTACGGGAGGCAGCAG	38	3	C	2011	B	F	22	158	47	14.8734	Severely Underweight	Non	PCD	0	0	0	0	0	0	0	0	0	0	0	0	0	0	0	0	0	0	0	0	0	0	0	0	0	0	0	0	0	0	0	0
38D	CAGACTCGCAGA	CCGTCAATTYMTTTRAGT	MID167	CCTACGGGAGGCAGCAG	38	4	D	2011	B	F	22	158	47	14.8734	Severely Underweight	Non	PCD	0	0	0	0	0	0	0	0	0	0	0	0	0	0	0	0	0	0	0	0	0	0	0	0	0	0	0	0	0	0	0	0
38E	CAGTGATCCTAG	CCGTCAATTYMTTTRAGT	MID179	CCTACGGGAGGCAGCAG	38	5	E	2011	B	F	22	158	47	14.8734	Severely Underweight	Non	PCD	0	0	0	0	0	0	0	0	0	0	0	0	0	0	0	0	0	0	0	0	0	0	0	0	0	0	0	0	0	0	0	0
38F	CATGAGTGCTAC	CCGTCAATTYMTTTRAGT	MID191	CCTACGGGAGGCAGCAG	38	6	F	2011	B	F	22	158	47	14.8734	Severely Underweight	Non	PCD	0	0	0	0	0	0	0	0	0	0	0	0	0	0	0	0	0	0	0	0	0	0	0	0	0	0	0	0	0	0	0	0
38G	ATACGTCTTCGA	CCGTCAATTYMTTTRAGT	MID108	CCTACGGGAGGCAGCAG	38	7	G	2011	B	F	22	158	47	14.8734	Severely Underweight	Non	PCD	0	0	0	0	0	0	0	0	0	0	0	0	0	0	0	0	0	0	0	0	0	0	0	0	0	0	0	0	0	0	0	0
39A	ATCGATCTGTGG	CCGTCAATTYMTTTRAGT	MID120	CCTACGGGAGGCAGCAG	39	1	A	2011	B	F	51	163	55.9	17.1472	Underweight	Ex	Other	0	0	0	0	0	0	0	0	0	0	0	0	0	0	0	0	0	0	0	0	0	0	0	0	0	0	0	0	0	0	0	0
39B	ATGATCGAGAGA	CCGTCAATTYMTTTRAGT	MID132	CCTACGGGAGGCAGCAG	39	2	B	2011	B	F	51	163	55.9	17.1472	Underweight	Ex	Other	0	0	0	0	0	0	0	0	0	0	0	0	0	0	0	0	0	0	0	0	0	0	0	0	0	0	0	0	0	0	0	0
39C	ATGTGTCGACTT	CCGTCAATTYMTTTRAGT	MID144	CCTACGGGAGGCAGCAG	39	3	C	2011	B	F	51	163	55.9	17.1472	Underweight	Ex	Other	0	0	0	0	0	0	0	0	0	0	0	0	0	0	0	0	0	0	0	0	0	0	0	0	0	0	0	0	0	0	0	0
39D	CACATTGTGAGC	CCGTCAATTYMTTTRAGT	MID156	CCTACGGGAGGCAGCAG	39	4	D	2011	B	F	51	163	55.9	17.1472	Underweight	Ex	Other	0	0	0	0	0	0	0	0	0	0	0	0	0	0	0	0	0	0	0	0	0	0	0	0	0	0	0	0	0	0	0	0
39E	CAGAGGAGCTCT	CCGTCAATTYMTTTRAGT	MID168	CCTACGGGAGGCAGCAG	39	5	E	2011	B	F	51	163	55.9	17.1472	Underweight	Ex	Other	0	0	0	0	0	0	0	0	0	0	0	0	0	0	0	0	0	0	0	0	0	0	0	0	0	0	0	0	0	0	0	0
39F	CAGTGCATATGC	CCGTCAATTYMTTTRAGT	MID180	CCTACGGGAGGCAGCAG	39	6	F	2011	B	F	51	163	55.9	17.1472	Underweight	Ex	Other	0	0	0	0	0	0	0	0	0	0	0	0	0	0	0	0	0	0	0	0	0	0	0	0	0	0	0	0	0	0	0	0
40A	CGAAGACTGCTG	CCGTCAATTYMTTTRAGT	MID205	CCTACGGGAGGCAGCAG	40	1	A	2011	B	M	64	187	85	22.7273	Normal	Non	ABPA	1	0	0	0	0	0	0	0	0	1	0	0	0	0	0	0	0	0	0	0	0	0	0	0	0	0	0	0	0	0	0	0
40B	CGATCGAGTGTT	CCGTCAATTYMTTTRAGT	MID217	CCTACGGGAGGCAGCAG	40	2	Be	2011	E	M	64	187	85	22.7273	Normal	Non	ABPA	1	0	0	0	0	0	0	0	0	1	0	0	0	0	0	0	0	0	0	0	0	0	0	0	0	0	0	0	0	0	0	0
40C	CGGAGTGTCTAT	CCGTCAATTYMTTTRAGT	MID229	CCTACGGGAGGCAGCAG	40	3	C	2011	R	M	64	187	85	22.7273	Normal	Non	ABPA	1	0	0	0	0	0	0	0	0	1	0	0	0	0	0	0	0	0	0	0	0	0	0	0	0	0	0	0	0	0	0	0
40D	CGTGACAATGTC	CCGTCAATTYMTTTRAGT	MID241	CCTACGGGAGGCAGCAG	40	4	D	2011	B	M	64	187	85	22.7273	Normal	Non	ABPA	1	0	0	0	0	0	0	0	0	1	0	0	0	0	0	0	0	0	0	0	0	0	0	0	0	0	0	0	0	0	0	0
40E	CTACTACAGGTG	CCGTCAATTYMTTTRAGT	MID253	CCTACGGGAGGCAGCAG	40	5	E	2011	B	M	64	187	85	22.7273	Normal	Non	ABPA	1	0	0	0	0	0	0	0	0	1	0	0	0	0	0	0	0	0	0	0	0	0	0	0	0	0	0	0	0	0	0	0
40F	CTCAGTATGCAG	CCGTCAATTYMTTTRAGT	MID265	CCTACGGGAGGCAGCAG	40	6	F	2011	B	M	64	187	85	22.7273	Normal	Non	ABPA	1	0	0	0	0	0	0	0	0	1	0	0	0	0	0	0	0	0	0	0	0	0	0	0	0	0	0	0	0	0	0	0
40G	CTGACACGACAG	CCGTCAATTYMTTTRAGT	MID277	CCTACGGGAGGCAGCAG	40	7	G	2011	B	M	64	187	85	22.7273	Normal	Non	ABPA	1	0	0	0	0	0	0	0	0	1	0	0	0	0	0	0	0	0	0	0	0	0	0	0	0	0	0	0	0	0	0	0
41A	CATGTAATGCTC	CCGTCAATTYMTTTRAGT	MID194	CCTACGGGAGGCAGCAG	41	1	A	2011	B	F	66	167	57	17.0659	Underweight	Non	Idiopathic	0	0	0	0	0	0	0	0	0	0	0	0	0	0	0	0	0	0	0	0	0	0	0	0	1	0	0	0	0	1	0	0
41B	CGAATCGACACT	CCGTCAATTYMTTTRAGT	MID206	CCTACGGGAGGCAGCAG	41	2	B	2011	B	F	66	167	57	17.0659	Underweight	Non	Idiopathic	0	0	0	0	0	0	0	0	0	0	0	0	0	0	0	0	0	0	0	0	0	0	0	0	1	1	0	0	0	1	0	0
41C	CGATGCACCAGA	CCGTCAATTYMTTTRAGT	MID218	CCTACGGGAGGCAGCAG	41	3	C	2011	B	F	66	167	57	17.0659	Underweight	Non	Idiopathic	0	0	0	0	0	0	0	0	0	0	0	0	0	0	0	0	0	0	0	0	0	0	0	0	1	0	0	0	0	1	0	0
41D	CGGCGATGTACA	CCGTCAATTYMTTTRAGT	MID230	CCTACGGGAGGCAGCAG	41	4	D	2011	B	F	66	167	57	17.0659	Underweight	Non	Idiopathic	0	0	0	0	0	0	0	0	0	0	0	0	0	0	0	0	0	0	0	0	0	0	0	0	0	0	0	0	0	0	0	0
41E	CGTGATCTCTCC	CCGTCAATTYMTTTRAGT	MID242	CCTACGGGAGGCAGCAG	41	5	E	2011	B	F	66	167	57	17.0659	Underweight	Non	Idiopathic	0	0	0	0	0	0	0	0	0	0	0	0	0	0	0	0	0	0	0	0	0	0	0	0	0	0	0	0	0	0	0	0
41F	CTACTGATATCG	CCGTCAATTYMTTTRAGT	MID254	CCTACGGGAGGCAGCAG	41	6	F	2011	B	F	66	167	57	17.0659	Underweight	Non	Idiopathic	0	0	0	0	0	0	0	0	0	0	0	0	0	0	0	0	0	0	0	0	0	0	0	0	0	0	0	0	0	0	0	0
41G	CTCATGTACAGT	CCGTCAATTYMTTTRAGT	MID266	CCTACGGGAGGCAGCAG	41	7	G	2011	B	F	66	167	57	17.0659	Underweight	Non	Idiopathic	0	0	0	0	0	0	0	0	0	0	0	0	0	0	0	0	0	0	0	0	0	0	0	0	0	0	0	0	0	0	0	0
42A	CTGAGATACGCG	CCGTCAATTYMTTTRAGT	MID278	CCTACGGGAGGCAGCAG	42	1	A	2011	B	M	62	173	111	32.0809	Obese	Non	Idiopathic	0	0	0	0	0	0	0	0	0	0	0	0	0	0	0	0	0	0	0	0	0	0	0	0	1	0	0	0	0	0	0	0
42B	CATGTCTCTCCG	CCGTCAATTYMTTTRAGT	MID195	CCTACGGGAGGCAGCAG	42	2	B	2011	R	M	62	173	111	32.0809	Obese	Non	Idiopathic	0	0	0	0	0	0	0	0	0	0	0	0	0	0	0	0	0	0	0	0	0	0	0	0	0	0	0	0	0	0	0	0
42C	CGACAGCTGACA	CCGTCAATTYMTTTRAGT	MID207	CCTACGGGAGGCAGCAG	42	3	C	2011	B	M	62	173	111	32.0809	Obese	Non	Idiopathic	0	0	0	0	0	0	0	0	0	0	0	0	0	0	0	0	0	0	0	0	0	0	0	0	0	0	0	0	0	0	0	0
42D	CGATGTCGTCAA	CCGTCAATTYMTTTRAGT	MID219	CCTACGGGAGGCAGCAG	42	4	D	2011	B	M	62	173	111	32.0809	Obese	Non	Idiopathic	0	0	0	0	0	0	0	0	0	0	0	0	0	0	0	0	0	0	0	0	0	0	0	0	0	0	0	0	0	0	0	0
43A	CGTAAGTCTACT	CCGTCAATTYMTTTRAGT	MID231	CCTACGGGAGGCAGCAG	43	1	A	2011	T	F	61	169	63.7	18.8462	Normal	Non	Idiopathic	0	0	0	0	0	0	0	0	0	0	0	0	0	0	0	0	0	0	0	0	0	0	0	0	0	0	0	0	0	0	0	0
43B	CGTGCATTATCA	CCGTCAATTYMTTTRAGT	MID243	CCTACGGGAGGCAGCAG	43	2	B	2011	B	F	61	169	63.7	18.8462	Normal	Non	Idiopathic	0	0	0	0	0	0	0	0	0	0	0	0	0	0	0	0	0	0	0	0	0	0	0	0	0	0	0	0	0	0	0	0
43C	CTAGAACGCACT	CCGTCAATTYMTTTRAGT	MID255	CCTACGGGAGGCAGCAG	43	3	C	2011	B	F	61	169	63.7	18.8462	Normal	Non	Idiopathic	0	0	0	0	0	0	0	0	0	0	0	0	0	0	0	0	0	0	0	0	0	0	0	0	0	0	0	0	0	0	0	0
43D	CTCCACATGAGA	CCGTCAATTYMTTTRAGT	MID267	CCTACGGGAGGCAGCAG	43	4	D	2011	B	F	61	169	63.7	18.8462	Normal	Non	Idiopathic	0	0	0	0	0	0	0	0	0	0	0	0	0	0	0	0	0	0	0	0	0	0	0	0	0	0	0	0	0	0	0	0
43E	CTGAGCAGAGTC	CCGTCAATTYMTTTRAGT	MID279	CCTACGGGAGGCAGCAG	43	5	E	2011	B	F	61	169	63.7	18.8462	Normal	Non	Idiopathic	0	0	0	0	0	0	0	0	0	0	0	0	0	0	0	0	0	0	0	0	0	0	0	0	0	0	0	0	0	0	0	0
43F	CATTCGATGACT	CCGTCAATTYMTTTRAGT	MID196	CCTACGGGAGGCAGCAG	43	6	F	2011	B	F	61	169	63.7	18.8462	Normal	Non	Idiopathic	0	0	0	0	0	0	0	0	0	0	0	0	0	0	0	0	0	0	0	0	0	0	0	0	0	0	0	0	0	0	0	0
43G	CGACATGCTATT	CCGTCAATTYMTTTRAGT	MID208	CCTACGGGAGGCAGCAG	43	1	G	2011	B	F	61	169	63.7	18.8462	Normal	Non	Idiopathic	0	0	0	0	0	0	0	0	0	0	0	0	0	0	0	0	0	0	0	0	0	0	0	0	0	0	0	0	0	0	0	0
43Ge	CGCACATGTTAT	CCGTCAATTYMTTTRAGT	MID220	CCTACGGGAGGCAGCAG	43	2	H	2011	R	F	61	169	63.7	18.8462	Normal	Non	Idiopathic	0	0	0	0	0	0	0	0	0	0	0	0	0	0	0	0	0	0	0	0	0	0	0	0	0	0	0	0	0	0	0	0
44A	CGTACAGTTATC	CCGTCAATTYMTTTRAGT	MID232	CCTACGGGAGGCAGCAG	44	1	Ae	2011	T	F	42	161	69.9	21.7081	Normal	Non	Idiopathic	1	0	0	0	1	0	0	0	0	0	0	0	0	0	0	0	0	0	0	0	0	0	0	0	0	0	0	0	0	0	0	0
44B	CGTGTACATCAG	CCGTCAATTYMTTTRAGT	MID244	CCTACGGGAGGCAGCAG	44	2	B	2011	B	F	42	161	69.9	21.7081	Normal	Non	Idiopathic	1	0	0	0	1	0	0	0	0	0	0	0	0	0	0	0	0	0	0	0	0	0	0	0	0	0	0	0	0	0	0	0
44C	CTAGAGACTCTT	CCGTCAATTYMTTTRAGT	MID256	CCTACGGGAGGCAGCAG	44	3	C	2011	B	F	42	161	69.9	21.7081	Normal	Non	Idiopathic	1	0	0	0	1	0	0	0	0	0	0	0	0	0	0	0	0	0	0	0	0	0	0	0	0	0	0	0	0	0	0	0
44D	CTCCTACTGTCT	CCGTCAATTYMTTTRAGT	MID268	CCTACGGGAGGCAGCAG	44	4	D	2011	B	F	42	161	69.9	21.7081	Normal	Non	Idiopathic	0	0	0	0	0	0	0	0	0	0	0	0	0	0	0	0	0	0	0	0	0	0	0	0	0	0	0	0	0	0	0	0
44F	CTGCAGTACTTA	CCGTCAATTYMTTTRAGT	MID280	CCTACGGGAGGCAGCAG	44	6	F	2011	B	F	42	161	69.9	21.7081	Normal	Non	Idiopathic	0	0	0	0	0	0	0	0	0	0	0	0	0	0	0	0	0	0	0	0	0	0	0	0	0	0	0	0	0	0	0	0
44G	CATTGTCTGTGA	CCGTCAATTYMTTTRAGT	MID197	CCTACGGGAGGCAGCAG	44	7	G	2011	R	F	42	161	69.9	21.7081	Normal	Non	Idiopathic	0	0	0	0	0	0	0	0	0	0	0	0	0	0	0	0	0	0	0	0	0	0	0	0	0	0	0	0	0	0	0	0
45A	CGACTTATGTGT	CCGTCAATTYMTTTRAGT	MID209	CCTACGGGAGGCAGCAG	45	1	A	2011	B	M	59	173	79.2	22.8902	Normal	Non	Other	0	0	0	0	0	0	0	0	0	0	0	0	0	0	0	0	0	0	0	0	0	0	0	0	0	0	0	0	0	0	0	0
45B	CGCACTCTAGAA	CCGTCAATTYMTTTRAGT	MID221	CCTACGGGAGGCAGCAG	45	2	B	2011	B	M	59	173	79.2	22.8902	Normal	Non	Other	0	0	0	0	0	0	0	0	0	0	0	0	0	0	0	0	0	0	0	0	0	0	0	0	0	0	0	0	0	0	0	0
45E	CGTACTAGACTG	CCGTCAATTYMTTTRAGT	MID233	CCTACGGGAGGCAGCAG	45	5	E	2011	B	M	59	173	79.2	22.8902	Normal	Non	Other	0	0	0	0	0	0	0	0	0	0	0	0	0	0	0	0	0	0	0	0	0	0	0	0	0	0	0	0	0	0	0	0
45G	CGTGTGATCAGG	CCGTCAATTYMTTTRAGT	MID245	CCTACGGGAGGCAGCAG	45	7	G	2011	B	M	59	173	79.2	22.8902	Normal	Non	Other	0	0	0	0	0	0	0	0	0	0	0	0	0	0	0	0	0	0	0	0	0	0	0	0	0	0	0	0	0	0	0	0
46A	CTAGCGAACATC	CCGTCAATTYMTTTRAGT	MID257	CCTACGGGAGGCAGCAG	46	1	A	2011	B	F	29	155	45.7	14.7419	Severely Underweight	Non	PostInfection	0	0	0	0	0	0	0	0	0	0	0	0	0	0	0	0	0	0	0	0	0	0	0	0	0	0	0	0	0	0	0	0
46B	CTCGAGAGTACG	CCGTCAATTYMTTTRAGT	MID269	CCTACGGGAGGCAGCAG	46	2	B	2011	B	F	29	155	45.7	14.7419	Severely Underweight	Non	PostInfection	0	0	0	0	0	0	0	0	0	0	0	0	0	0	0	0	0	0	0	0	0	0	0	0	0	0	0	0	0	0	0	0
47A	CTGCTGCGAAGA	CCGTCAATTYMTTTRAGT	MID281	CCTACGGGAGGCAGCAG	47	1	A	2011	B	F	72	164.5	65.7	19.9696	Normal	Non	PostInfection	1	0	0	0	1	0	0	0	0	1	0	0	0	0	0	0	0	0	0	0	0	0	0	0	0	0	0	0	0	0	0	0
47B	CCAGATGATCGT	CCGTCAATTYMTTTRAGT	MID198	CCTACGGGAGGCAGCAG	47	2	B	2011	B	F	72	164.5	65.7	19.9696	Normal	Non	PostInfection	1	0	0	0	1	0	0	0	0	1	0	0	0	0	0	0	0	0	0	0	0	0	0	0	0	0	0	0	0	0	0	0
47Cdupe	TCTACGGAGAGC	CCGTCAATTYMTTTRAGT	MID530	CCTACGGGAGGCAGCAG	47	3	C	2011	B	F	72	164.5	65.7	19.9696	Normal	Non	PostInfection	1	0	0	0	1	0	0	0	0	1	0	0	0	0	0	0	0	0	0	0	0	0	0	0	0	0	0	0	0	0	0	0
47D	CGCAGACAGACT	CCGTCAATTYMTTTRAGT	MID222	CCTACGGGAGGCAGCAG	47	4	D	2011	B	F	72	164.5	65.7	19.9696	Normal	Non	PostInfection	1	0	0	0	1	0	0	0	0	1	0	0	0	0	0	0	0	0	0	0	0	0	0	0	0	0	0	0	0	0	0	0
50A	CCATACATAGCT	CCGTCAATTYMTTTRAGT	MID200	CCTACGGGAGGCAGCAG	50	1	A	2011	R	F	64	156	50.5	16.1859	Underweight	Non	Idiopathic	0	0	0	0	0	0	0	0	0	0	0	0	0	0	0	0	0	0	0	0	0	0	0	0	0	0	0	0	0	0	0	0
50B	CGAGGCTCAGTA	CCGTCAATTYMTTTRAGT	MID212	CCTACGGGAGGCAGCAG	50	2	B	2011	B	F	64	156	50.5	16.1859	Underweight	Non	Idiopathic	0	0	0	0	0	0	0	0	0	0	0	0	0	0	0	0	0	0	0	0	0	0	0	0	0	0	0	0	0	0	0	0
50C	CGCATGAGGATC	CCGTCAATTYMTTTRAGT	MID224	CCTACGGGAGGCAGCAG	50	3	C	2011	B	F	64	156	50.5	16.1859	Underweight	Non	Idiopathic	0	0	0	0	0	0	0	0	0	0	0	0	0	0	0	0	0	0	0	0	0	0	0	0	0	0	0	0	0	0	0	0
50D	CGTATGCTGTAT	CCGTCAATTYMTTTRAGT	MID236	CCTACGGGAGGCAGCAG	50	4	D	2011	R	F	64	156	50.5	16.1859	Underweight	Non	Idiopathic	0	0	0	0	0	0	0	0	0	0	0	0	0	0	0	0	0	0	0	0	0	0	0	0	0	0	0	0	0	0	0	0
50E	CGTTCGCATAGA	CCGTCAATTYMTTTRAGT	MID248	CCTACGGGAGGCAGCAG	50	5	E	2011	B	F	64	156	50.5	16.1859	Underweight	Non	Idiopathic	0	0	0	0	0	0	0	0	0	0	0	0	0	0	0	0	0	0	0	0	0	0	0	0	0	0	0	0	0	0	0	0
50F	CTATAGTCGTGT	CCGTCAATTYMTTTRAGT	MID260	CCTACGGGAGGCAGCAG	50	6	F	2011	B	F	64	156	50.5	16.1859	Underweight	Non	Idiopathic	0	0	0	0	0	0	0	0	0	0	0	0	0	0	0	0	0	0	0	0	0	0	0	0	0	0	0	0	0	0	0	0
50G	CTCGTGGAGTAG	CCGTCAATTYMTTTRAGT	MID272	CCTACGGGAGGCAGCAG	50	7	G	2011	B	F	64	156	50.5	16.1859	Underweight	Non	Idiopathic	0	0	0	0	0	0	0	0	0	0	0	0	0	0	0	0	0	0	0	0	0	0	0	0	0	0	0	0	0	0	0	0
51A	CTGGCTGTATGA	CCGTCAATTYMTTTRAGT	MID284	CCTACGGGAGGCAGCAG	51	1	A	2011	B	F	75	167	92.6	27.7246	Overweight	Ex	Idiopathic	1	0	0	0	0	0	0	0	0	1	0	0	0	0	0	0	0	0	0	0	0	0	0	0	0	0	0	0	0	0	0	0
51B	CCGACTGAGATG	CCGTCAATTYMTTTRAGT	MID201	CCTACGGGAGGCAGCAG	51	2	B	2011	B	F	75	167	92.6	27.7246	Overweight	Ex	Idiopathic	0	0	0	0	0	0	0	0	0	0	0	0	0	0	0	0	0	0	0	0	0	0	0	0	0	0	0	0	0	0	0	0
51C	CGAGTCTAGTTG	CCGTCAATTYMTTTRAGT	MID213	CCTACGGGAGGCAGCAG	51	3	C	2011	B	F	75	167	92.6	27.7246	Overweight	Ex	Idiopathic	0	0	0	0	0	0	0	0	0	0	0	0	0	0	0	0	0	0	0	0	0	0	0	0	0	0	0	0	0	0	0	0
51D	CGCGATAGCAGT	CCGTCAATTYMTTTRAGT	MID225	CCTACGGGAGGCAGCAG	51	4	De	2011	E	F	75	167	92.6	27.7246	Overweight	Ex	Idiopathic	0	0	0	0	0	0	0	0	0	0	0	0	0	0	0	0	0	0	0	0	0	0	0	0	0	0	0	0	0	0	0	0
51E	CGTCAACGATGT	CCGTCAATTYMTTTRAGT	MID237	CCTACGGGAGGCAGCAG	51	5	E	2011	R	F	75	167	92.6	27.7246	Overweight	Ex	Idiopathic	0	0	0	0	0	0	0	0	0	0	0	0	0	0	0	0	0	0	0	0	0	0	0	0	0	0	0	0	0	0	0	0
51F	CTAACGCAGTCA	CCGTCAATTYMTTTRAGT	MID249	CCTACGGGAGGCAGCAG	51	6	F	2011	B	F	75	167	92.6	27.7246	Overweight	Ex	Idiopathic	0	0	0	0	0	0	0	0	0	0	0	0	0	0	0	0	0	0	0	0	0	0	0	0	0	0	0	0	0	0	0	0
51G	CTATCAGTGTAC	CCGTCAATTYMTTTRAGT	MID261	CCTACGGGAGGCAGCAG	51	7	G	2011	R	F	75	167	92.6	27.7246	Overweight	Ex	Idiopathic	1	0	0	0	0	0	0	0	0	1	0	0	0	0	0	0	0	0	0	0	0	0	0	0	0	0	0	0	0	0	0	0
53A	CTGTCTCTCCTA	CCGTCAATTYMTTTRAGT	MID286	CCTACGGGAGGCAGCAG	53	1	A	2011	B	F	45	160	51.1	15.9688	Severely Underweight	Non	Idiopathic	1	0	0	0	0	0	0	0	0	1	0	0	0	0	0	0	0	0	0	0	0	0	0	0	0	0	0	0	0	0	0	0
53B	CCTAGTACTGAT	CCGTCAATTYMTTTRAGT	MID203	CCTACGGGAGGCAGCAG	53	2	B	2011	B	F	45	160	51.1	15.9688	Severely Underweight	Non	Idiopathic	0	0	0	0	0	0	0	0	0	0	0	0	0	0	0	0	0	0	0	0	0	0	0	0	0	0	0	0	0	0	0	0
53C	CGATAGATCTTC	CCGTCAATTYMTTTRAGT	MID215	CCTACGGGAGGCAGCAG	53	3	Ce	2011	T	F	45	160	51.1	15.9688	Severely Underweight	Non	Idiopathic	0	0	0	0	0	0	0	0	0	0	0	0	0	0	0	0	0	0	0	0	0	0	0	0	0	0	0	0	0	0	0	0
53D	CGCTAGAACGCA	CCGTCAATTYMTTTRAGT	MID227	CCTACGGGAGGCAGCAG	53	4	D	2011	B	F	45	160	51.1	15.9688	Severely Underweight	Non	Idiopathic	0	0	0	0	0	0	0	0	0	0	0	0	0	0	0	0	0	0	0	0	0	0	0	0	0	0	0	0	0	0	0	0
53E	CGTCAGACGGAT	CCGTCAATTYMTTTRAGT	MID239	CCTACGGGAGGCAGCAG	53	5	E	2011	B	F	45	160	51.1	15.9688	Severely Underweight	Non	Idiopathic	0	0	0	0	0	0	0	0	0	0	0	0	0	0	0	0	0	0	0	0	0	0	0	0	0	0	0	0	0	0	0	0
53F	CTACATCTAAGC	CCGTCAATTYMTTTRAGT	MID251	CCTACGGGAGGCAGCAG	53	6	F	2011	B	F	45	160	51.1	15.9688	Severely Underweight	Non	Idiopathic	0	0	0	0	0	0	0	0	0	0	0	0	0	0	0	0	0	0	0	0	0	0	0	0	0	0	0	0	0	0	0	0
53G	CTATGCTTGATG	CCGTCAATTYMTTTRAGT	MID263	CCTACGGGAGGCAGCAG	53	7	G	2011	R	F	45	160	51.1	15.9688	Severely Underweight	Non	Idiopathic	0	0	0	0	0	0	0	0	0	0	0	0	0	0	0	0	0	0	0	0	0	0	0	0	0	0	0	0	0	0	0	0
54A	CTCTGCTAGCCT	CCGTCAATTYMTTTRAGT	MID275	CCTACGGGAGGCAGCAG	54	1	A	2011	B	F	59	169	68.9	20.3846	Normal	Non	PostInfection	1	0	0	0	0	0	0	0	0	0	0	1	0	0	0	0	0	0	0	0	0	0	0	0	0	0	0	0	0	0	0	0
54B	CTGTGACATTGT	CCGTCAATTYMTTTRAGT	MID287	CCTACGGGAGGCAGCAG	54	2	B	2011	B	F	59	169	68.9	20.3846	Normal	Non	PostInfection	0	0	0	0	0	0	0	0	0	0	0	0	0	0	0	0	0	0	0	0	0	0	0	0	0	0	0	0	0	0	0	0
54C	CCTCTCGTGATC	CCGTCAATTYMTTTRAGT	MID204	CCTACGGGAGGCAGCAG	54	3	C	2011	B	F	59	169	68.9	20.3846	Normal	Non	PostInfection	0	0	0	0	0	0	0	0	0	0	0	0	0	0	0	0	0	0	0	0	0	0	0	0	0	0	0	0	0	0	0	0
54D	CGATATTCATCG	CCGTCAATTYMTTTRAGT	MID216	CCTACGGGAGGCAGCAG	54	4	D	2011	B	F	59	169	68.9	20.3846	Normal	Non	PostInfection	0	0	0	0	0	0	0	0	0	0	0	0	0	0	0	0	0	0	0	0	0	0	0	0	0	0	0	0	0	0	0	0
54E	CGCTTATCGAGA	CCGTCAATTYMTTTRAGT	MID228	CCTACGGGAGGCAGCAG	54	5	E	2011	B	F	59	169	68.9	20.3846	Normal	Non	PostInfection	0	0	0	0	0	0	0	0	0	0	0	0	0	0	0	0	0	0	0	0	0	0	0	0	0	0	0	0	0	0	0	0
54F	CGTCGATCTCTC	CCGTCAATTYMTTTRAGT	MID240	CCTACGGGAGGCAGCAG	54	6	F	2011	R	F	59	169	68.9	20.3846	Normal	Non	PostInfection	0	0	0	0	0	0	0	0	0	0	0	0	0	0	0	0	0	0	0	0	0	0	0	0	0	0	0	0	0	0	0	0
54G	CTACGCGTCTCT	CCGTCAATTYMTTTRAGT	MID252	CCTACGGGAGGCAGCAG	54	7	G	2011	R	F	59	169	68.9	20.3846	Normal	Non	PostInfection	0	0	0	0	0	0	0	0	0	0	0	0	0	0	0	0	0	0	0	0	0	0	0	0	0	0	0	0	0	0	0	0
55A	CTCAATGACTCA	CCGTCAATTYMTTTRAGT	MID264	CCTACGGGAGGCAGCAG	55	1	A	2011	B	M	60	179	74.2	20.7263	Normal	Non	ABPA	0	0	0	0	0	0	0	0	0	0	0	0	0	0	0	0	0	0	0	0	0	0	0	0	0	0	0	0	0	0	0	0
55D	CTGAACGCTAGT	CCGTCAATTYMTTTRAGT	MID276	CCTACGGGAGGCAGCAG	55	4	D	2011	B	M	60	179	74.2	20.7263	Normal	Non	ABPA	0	0	0	0	0	0	0	0	0	0	0	0	0	0	0	0	0	0	0	0	0	0	0	0	0	0	0	0	0	0	0	0
55E	CTGTTCGTAGAG	CCGTCAATTYMTTTRAGT	MID289	CCTACGGGAGGCAGCAG	55	5	E	2011	B	M	60	179	74.2	20.7263	Normal	Non	ABPA	0	0	0	0	0	0	0	0	0	0	0	0	0	0	0	0	0	0	0	0	0	0	0	0	1	0	0	0	0	0	0	0
55G	GACAGGAGATAG	CCGTCAATTYMTTTRAGT	MID301	CCTACGGGAGGCAGCAG	55	7	G	2011	B	M	60	179	74.2	20.7263	Normal	Non	ABPA	0	0	0	0	0	0	0	0	0	0	0	0	0	0	0	0	0	0	0	0	0	0	0	0	0	0	0	0	0	0	0	0
56A	GACTCACTCAAT	CCGTCAATTYMTTTRAGT	MID313	CCTACGGGAGGCAGCAG	56	1	A	2011	B	F	41	162	66	20.3704	Normal	NA	Immunodeficiency	0	0	0	0	0	0	0	0	0	0	0	0	0	0	0	0	0	0	0	0	0	0	0	0	0	0	0	0	0	0	0	0
56B	GAGCATTCTCTA	CCGTCAATTYMTTTRAGT	MID325	CCTACGGGAGGCAGCAG	56	2	B	2011	R	F	41	162	66	20.3704	Normal	NA	Immunodeficiency	0	0	0	0	0	0	0	0	0	0	0	0	0	0	0	0	0	0	0	0	0	0	0	0	0	0	0	0	0	0	0	0
56C	GATCAGAAGATG	CCGTCAATTYMTTTRAGT	MID337	CCTACGGGAGGCAGCAG	56	3	C	2011	B	F	41	162	66	20.3704	Normal	NA	Immunodeficiency	0	0	0	0	0	0	0	0	0	0	0	0	0	0	0	0	0	0	0	0	0	0	0	0	0	0	0	0	0	0	0	0
56D	GCAATAGCTGCT	CCGTCAATTYMTTTRAGT	MID349	CCTACGGGAGGCAGCAG	56	4	D	2011	B	F	41	162	66	20.3704	Normal	NA	Immunodeficiency	0	0	0	0	0	0	0	0	0	0	0	0	0	0	0	0	0	0	0	0	0	0	0	0	0	0	0	0	0	0	0	0
56E	GCATATAGTCTC	CCGTCAATTYMTTTRAGT	MID361	CCTACGGGAGGCAGCAG	56	5	E	2011	B	F	41	162	66	20.3704	Normal	NA	Immunodeficiency	0	0	0	0	0	0	0	0	0	0	0	0	0	0	0	0	0	0	0	0	0	0	0	0	0	0	0	0	0	0	0	0
56F	GCGTATCTTGAT	CCGTCAATTYMTTTRAGT	MID373	CCTACGGGAGGCAGCAG	56	6	F	2011	B	F	41	162	66	20.3704	Normal	NA	Immunodeficiency	0	0	0	0	0	0	0	0	0	0	0	0	0	0	0	0	0	0	0	0	0	0	0	0	0	0	0	0	0	0	0	0
56G	CTTAGCACATCA	CCGTCAATTYMTTTRAGT	MID290	CCTACGGGAGGCAGCAG	56	7	G	2011	B	F	41	162	66	20.3704	Normal	NA	Immunodeficiency	0	0	0	0	0	0	0	0	0	0	0	0	0	0	0	0	0	0	0	0	0	0	0	0	0	0	0	0	0	0	0	0
57A	GACAGTTACTGC	CCGTCAATTYMTTTRAGT	MID302	CCTACGGGAGGCAGCAG	57	1	A	2011	B	F	77	153	48.6	15.8824	Severely Underweight	NA	Idiopathic	1	0	0	0	1	0	0	0	0	0	0	0	0	0	0	0	0	0	0	0	0	0	0	0	0	0	0	0	0	0	0	0
57B	GACTCGAATCGT	CCGTCAATTYMTTTRAGT	MID314	CCTACGGGAGGCAGCAG	57	2	B	2011	B	F	77	153	48.6	15.8824	Severely Underweight	NA	Idiopathic	1	0	0	0	1	0	0	0	0	0	0	0	0	0	0	0	0	0	0	0	0	0	0	0	0	0	0	0	0	0	0	0
57C	GAGCTGGCTGAT	CCGTCAATTYMTTTRAGT	MID326	CCTACGGGAGGCAGCAG	57	3	C	2011	R	F	77	153	48.6	15.8824	Severely Underweight	NA	Idiopathic	1	0	0	0	1	0	0	0	0	0	0	0	0	0	0	0	0	0	0	0	0	0	0	0	0	0	0	0	0	0	0	0
57D	GATCCGACACTA	CCGTCAATTYMTTTRAGT	MID338	CCTACGGGAGGCAGCAG	57	4	D	2011	B	F	77	153	48.6	15.8824	Severely Underweight	NA	Idiopathic	1	0	0	0	1	0	0	0	0	0	0	0	0	0	0	0	0	0	0	0	0	0	0	0	0	0	0	0	0	0	0	0
57E	GCACATCGAGCA	CCGTCAATTYMTTTRAGT	MID350	CCTACGGGAGGCAGCAG	57	5	E	2011	B	F	77	153	48.6	15.8824	Severely Underweight	NA	Idiopathic	1	0	0	0	1	0	0	0	0	0	0	0	0	0	0	0	0	0	0	0	0	0	0	0	0	0	0	0	0	0	0	0
57F	GCATCGTCAACA	CCGTCAATTYMTTTRAGT	MID362	CCTACGGGAGGCAGCAG	57	6	F	2011	B	F	77	153	48.6	15.8824	Severely Underweight	NA	Idiopathic	1	0	0	0	1	0	0	0	0	0	0	0	0	0	0	0	0	0	0	0	0	0	0	0	0	0	0	0	0	0	0	0
57G	GCGTTACACACA	CCGTCAATTYMTTTRAGT	MID374	CCTACGGGAGGCAGCAG	57	7	G	2011	R	F	77	153	48.6	15.8824	Severely Underweight	NA	Idiopathic	1	0	0	0	1	0	0	0	0	0	0	0	0	0	0	0	0	0	0	0	0	0	0	0	0	0	0	0	0	0	0	0
58A	CTTGATGCGTAT	CCGTCAATTYMTTTRAGT	MID291	CCTACGGGAGGCAGCAG	58	1	A	2011	B	M	76	180.5	70.1	19.4183	Normal	Non	Idiopathic	1	0	0	0	0	0	0	0	0	1	0	0	0	0	0	0	0	0	0	0	0	0	0	0	0	0	0	0	0	0	0	0
58B	GACATCGGCTAT	CCGTCAATTYMTTTRAGT	MID303	CCTACGGGAGGCAGCAG	58	2	B	2011	B	M	76	180.5	70.1	19.4183	Normal	Non	Idiopathic	1	0	0	0	0	0	0	0	0	1	0	0	0	0	0	0	0	0	0	0	0	0	0	0	0	0	0	0	0	0	0	0
58C	GACTGATCATCT	CCGTCAATTYMTTTRAGT	MID315	CCTACGGGAGGCAGCAG	58	3	C	2011	B	M	76	180.5	70.1	19.4183	Normal	Non	Idiopathic	1	0	0	0	0	0	0	0	0	1	0	0	0	0	0	0	0	0	0	0	0	0	0	0	0	0	0	0	0	0	0	0
58D	GAGGCTCATCAT	CCGTCAATTYMTTTRAGT	MID327	CCTACGGGAGGCAGCAG	58	4	D	2011	R	M	76	180.5	70.1	19.4183	Normal	Non	Idiopathic	1	0	0	0	0	0	0	0	0	1	0	0	0	0	0	0	0	0	0	0	0	0	0	0	0	0	0	0	0	0	0	0
58E	GATCGCAGGTGT	CCGTCAATTYMTTTRAGT	MID339	CCTACGGGAGGCAGCAG	58	5	E	2011	B	M	76	180.5	70.1	19.4183	Normal	Non	Idiopathic	1	0	0	0	0	0	0	0	0	1	0	0	0	0	0	0	0	0	0	0	0	0	0	0	0	0	0	0	0	0	0	0
58F	GCACGACAACAC	CCGTCAATTYMTTTRAGT	MID351	CCTACGGGAGGCAGCAG	58	6	F	2011	B	M	76	180.5	70.1	19.4183	Normal	Non	Idiopathic	1	0	0	0	0	0	0	0	0	1	0	0	0	0	0	0	0	0	0	0	0	0	0	0	0	0	0	0	0	0	0	0
58G	GCATGTGCATGT	CCGTCAATTYMTTTRAGT	MID363	CCTACGGGAGGCAGCAG	58	7	G	2011	R	M	76	180.5	70.1	19.4183	Normal	Non	Idiopathic	1	0	0	0	0	0	0	0	0	1	0	0	0	0	0	0	0	0	0	0	0	0	0	0	0	0	0	0	0	0	0	0
59A	GCTAAGAGAGTA	CCGTCAATTYMTTTRAGT	MID375	CCTACGGGAGGCAGCAG	59	1	Ae	2011	E	F	64	179	47.5	13.2682	Severely Underweight	Non	Idiopathic	0	0	0	0	0	0	0	0	0	0	0	0	0	0	0	0	0	0	0	0	0	0	0	0	0	0	0	0	0	0	0	0
60A	CTTGTGTCGATA	CCGTCAATTYMTTTRAGT	MID292	CCTACGGGAGGCAGCAG	60	1	A	2011	B	M	67	164	104.7	31.9207	Obese	Ex	Idiopathic	0	0	0	0	0	0	0	0	0	0	0	0	0	0	0	0	0	0	0	0	0	0	0	0	0	0	0	0	0	0	0	0
61A	GACCACTACGAT	CCGTCAATTYMTTTRAGT	MID304	CCTACGGGAGGCAGCAG	61	2	A	2011	B	F	57	156	89.6	28.7179	Overweight	Non	Idiopathic	1	0	0	0	0	0	0	0	0	1	0	0	0	0	0	0	0	0	0	0	0	0	0	0	0	0	0	0	0	0	0	0
61B	GACTGCATCTTA	CCGTCAATTYMTTTRAGT	MID316	CCTACGGGAGGCAGCAG	61	3	B	2011	B	F	57	156	89.6	28.7179	Overweight	Non	Idiopathic	1	0	0	0	0	0	0	0	0	1	0	0	0	0	0	0	0	0	0	0	0	0	0	0	0	0	0	0	0	0	0	0
61C	GAGTAGCTCGTG	CCGTCAATTYMTTTRAGT	MID328	CCTACGGGAGGCAGCAG	61	4	C	2011	B	F	57	156	89.6	28.7179	Overweight	Non	Idiopathic	1	0	0	0	0	0	0	0	0	1	0	0	0	0	0	0	0	0	0	0	0	0	0	0	0	0	0	0	0	0	0	0
61D	GATCGTCCAGAT	CCGTCAATTYMTTTRAGT	MID340	CCTACGGGAGGCAGCAG	61	5	D	2011	B	F	57	156	89.6	28.7179	Overweight	Non	Idiopathic	0	0	0	0	0	0	0	0	0	0	0	0	0	0	0	0	0	0	0	0	0	0	0	0	0	0	0	0	0	0	0	0
61DEe	GCACTCGTTAGA	CCGTCAATTYMTTTRAGT	MID352	CCTACGGGAGGCAGCAG	61	6	DEe	2011	E	F	57	156	89.6	28.7179	Overweight	Non	Idiopathic	0	0	0	0	0	0	0	0	0	0	0	0	0	0	0	0	0	0	0	0	0	0	0	0	0	0	0	0	0	0	0	0
61E	GCATTGCGTGAG	CCGTCAATTYMTTTRAGT	MID364	CCTACGGGAGGCAGCAG	61	7	E	2011	R	F	57	156	89.6	28.7179	Overweight	Non	Idiopathic	1	0	0	0	0	0	0	0	0	1	0	0	0	0	0	0	0	0	0	0	0	0	0	0	0	0	0	0	0	0	0	0
61F	GCTAGATGCCAG	CCGTCAATTYMTTTRAGT	MID376	CCTACGGGAGGCAGCAG	61	8	Fe	2011	E	F	57	156	89.6	28.7179	Overweight	Non	Idiopathic	1	0	0	0	0	0	0	0	0	1	0	0	0	0	0	0	0	0	0	0	0	0	0	0	0	0	0	0	0	0	0	0
61G	GAACATGATGAG	CCGTCAATTYMTTTRAGT	MID293	CCTACGGGAGGCAGCAG	61	9	G	2011	R	F	57	156	89.6	28.7179	Overweight	Non	Idiopathic	1	0	0	0	0	0	0	0	0	1	0	0	0	0	0	0	0	0	0	0	0	0	0	0	0	0	0	0	0	0	0	0
62A	GACCGAGCTATG	CCGTCAATTYMTTTRAGT	MID305	CCTACGGGAGGCAGCAG	62	1	A	2011	B	F	53	172	54.2	15.7558	Severely Underweight	Non	PostInfection	1	0	0	0	1	0	0	0	0	0	0	0	0	0	0	0	0	0	0	0	0	0	0	0	0	0	0	0	0	0	0	0
62C	GACTGTCATGCA	CCGTCAATTYMTTTRAGT	MID317	CCTACGGGAGGCAGCAG	62	3	C	2011	B	F	53	172	54.2	15.7558	Severely Underweight	Non	PostInfection	1	0	0	0	1	0	0	0	0	0	0	0	0	0	0	0	0	0	0	0	0	0	0	0	0	0	0	0	0	0	0	0
62D	GAGTATGCAGCC	CCGTCAATTYMTTTRAGT	MID329	CCTACGGGAGGCAGCAG	62	4	D	2011	B	F	53	172	54.2	15.7558	Severely Underweight	Non	PostInfection	1	0	0	0	1	0	0	0	0	0	0	0	0	0	0	0	0	0	0	0	0	0	0	0	0	0	0	0	0	0	0	0
63A	GATCTATCCGAG	CCGTCAATTYMTTTRAGT	MID341	CCTACGGGAGGCAGCAG	63	1	A	2011	B	F	27	170	77.3	22.7353	Normal	Non	ABPA	0	0	0	0	0	0	0	0	0	0	0	0	0	0	0	0	0	0	0	0	0	0	0	0	0	0	0	0	0	0	0	0
63B	GCACTGAGACGT	CCGTCAATTYMTTTRAGT	MID353	CCTACGGGAGGCAGCAG	63	2	B	2011	R	F	27	170	77.3	22.7353	Normal	Non	ABPA	0	0	0	0	0	0	0	0	0	0	0	0	0	0	0	0	0	0	0	0	0	0	0	0	0	0	0	0	0	0	0	0
63C	GCCACTGATAGT	CCGTCAATTYMTTTRAGT	MID365	CCTACGGGAGGCAGCAG	63	3	C	2011	B	F	27	170	77.3	22.7353	Normal	Non	ABPA	0	0	0	0	0	0	0	0	0	0	0	0	0	0	0	0	0	0	0	0	0	0	0	0	0	0	0	0	0	0	0	0
63D	GCTAGTCTGAAC	CCGTCAATTYMTTTRAGT	MID377	CCTACGGGAGGCAGCAG	63	4	D	2011	B	F	27	170	77.3	22.7353	Normal	Non	ABPA	0	0	0	0	0	0	0	0	0	0	0	0	0	0	0	0	0	0	0	0	0	0	0	0	0	0	0	0	0	0	0	0
63E	GAACTGTATCTC	CCGTCAATTYMTTTRAGT	MID294	CCTACGGGAGGCAGCAG	63	5	E	2011	B	F	27	170	77.3	22.7353	Normal	Non	ABPA	0	0	0	0	0	0	0	0	0	0	0	0	0	0	0	0	0	0	0	0	0	0	0	0	0	0	0	0	0	0	0	0
63F	GACGAGTCAGTC	CCGTCAATTYMTTTRAGT	MID306	CCTACGGGAGGCAGCAG	63	6	F	2011	B	F	27	170	77.3	22.7353	Normal	Non	ABPA	0	0	0	0	0	0	0	0	0	0	0	0	0	0	0	0	0	0	0	0	0	0	0	0	0	0	0	0	0	0	0	0
63G	GACTTCAGTGTG	CCGTCAATTYMTTTRAGT	MID318	CCTACGGGAGGCAGCAG	63	7	G	2011	R	F	27	170	77.3	22.7353	Normal	Non	ABPA	0	0	0	0	0	0	0	0	0	0	0	0	0	0	0	0	0	0	0	0	0	0	0	0	0	0	0	0	0	0	0	0
64A	GAGTCTGAGTCT	CCGTCAATTYMTTTRAGT	MID330	CCTACGGGAGGCAGCAG	64	1	A	2011	B	F	62	161	55	17.0807	Underweight	Non	Other	1	0	0	0	1	0	0	0	0	0	0	0	0	0	0	0	0	0	0	0	0	0	0	0	0	0	0	0	0	0	0	0
64B	GATCTCATAGGC	CCGTCAATTYMTTTRAGT	MID342	CCTACGGGAGGCAGCAG	64	2	B	2011	B	F	62	161	55	17.0807	Underweight	Non	Other	1	0	0	0	1	0	0	0	0	0	0	0	0	0	0	0	0	0	0	0	0	0	0	0	0	0	0	0	0	0	0	0
64C	GCAGCACGTTGA	CCGTCAATTYMTTTRAGT	MID354	CCTACGGGAGGCAGCAG	64	3	C	2011	R	F	62	161	55	17.0807	Underweight	Non	Other	0	0	0	0	0	0	0	0	0	0	0	0	0	0	0	0	0	0	0	0	0	0	0	0	0	0	0	0	0	0	0	0
64D	GCCAGAGTCGTA	CCGTCAATTYMTTTRAGT	MID366	CCTACGGGAGGCAGCAG	64	4	D	2011	B	F	62	161	55	17.0807	Underweight	Non	Other	0	0	0	0	0	0	0	0	0	0	0	0	0	0	0	0	0	0	0	0	0	0	0	0	0	0	0	0	0	0	0	0
64E	GCTATCACGAGT	CCGTCAATTYMTTTRAGT	MID378	CCTACGGGAGGCAGCAG	64	5	E	2011	B	F	62	161	55	17.0807	Underweight	Non	Other	0	0	0	0	0	0	0	0	0	0	0	0	0	0	0	0	0	0	0	0	0	0	0	0	0	0	0	0	0	0	0	0
64F	GAAGAGTGATCA	CCGTCAATTYMTTTRAGT	MID295	CCTACGGGAGGCAGCAG	64	6	F	2011	B	F	62	161	55	17.0807	Underweight	Non	Other	0	0	0	0	0	0	0	0	0	0	0	0	0	0	0	0	0	0	0	0	0	0	0	0	0	0	0	0	0	0	0	0
64G	GACGATATCGCG	CCGTCAATTYMTTTRAGT	MID307	CCTACGGGAGGCAGCAG	64	7	G	2011	B	F	62	161	55	17.0807	Underweight	Non	Other	1	0	0	0	1	0	0	0	0	0	0	0	0	0	0	0	0	0	0	0	0	0	0	0	0	0	0	0	0	0	0	0
65A	GAGAATACGTGA	CCGTCAATTYMTTTRAGT	MID319	CCTACGGGAGGCAGCAG	65	1	A	2011	B	F	72	158.5	82.7	26.0883	Overweight	NA	Idiopathic	0	0	0	0	0	0	0	0	0	0	0	0	0	0	0	0	0	0	0	0	0	0	0	0	0	0	0	0	0	0	0	0
66A	GAGTGAGTACAA	CCGTCAATTYMTTTRAGT	MID331	CCTACGGGAGGCAGCAG	66	1	A	2011	B	M	33	175	89	25.4286	Overweight	Non	Idiopathic	0	0	0	0	0	0	0	0	0	0	0	0	0	0	0	0	0	0	0	0	0	0	0	0	0	0	0	0	0	0	0	0
67A	GATCTTCAGTAC	CCGTCAATTYMTTTRAGT	MID343	CCTACGGGAGGCAGCAG	67	1	A	2011	B	F	66	150	45	15	Severely Underweight	Non	PostInfection	1	0	0	0	1	0	0	0	0	1	0	0	0	0	0	0	0	0	0	0	0	0	0	0	0	0	0	0	0	0	0	0
67B	GCAGCCGAGTAT	CCGTCAATTYMTTTRAGT	MID355	CCTACGGGAGGCAGCAG	67	2	B	2011	R	F	66	150	45	15	Severely Underweight	Non	PostInfection	1	0	0	0	1	0	0	0	0	1	0	0	0	0	0	0	0	0	0	0	0	0	0	0	0	0	0	0	0	0	0	0
67C	GCCTATACTACA	CCGTCAATTYMTTTRAGT	MID367	CCTACGGGAGGCAGCAG	67	3	C	2011	R	F	66	150	45	15	Severely Underweight	Non	PostInfection	1	0	0	0	1	0	0	0	0	1	0	0	0	0	0	0	0	0	0	0	0	0	0	0	0	0	0	0	0	0	0	0
67D	GCTATTCGACAT	CCGTCAATTYMTTTRAGT	MID379	CCTACGGGAGGCAGCAG	67	4	D	2011	B	F	66	150	45	15	Severely Underweight	Non	PostInfection	1	0	0	0	1	0	0	0	0	1	0	0	0	0	0	0	0	0	0	0	0	0	0	0	0	0	0	0	0	0	0	0
67E	GAAGCTACTGTC	CCGTCAATTYMTTTRAGT	MID296	CCTACGGGAGGCAGCAG	67	5	Ee	2011	E	F	66	150	45	15	Severely Underweight	Non	PostInfection	1	0	0	0	1	0	0	0	0	1	0	0	0	0	0	0	0	0	0	0	0	0	0	0	0	0	0	0	0	0	0	0
67F	GACGCAGTAGCT	CCGTCAATTYMTTTRAGT	MID308	CCTACGGGAGGCAGCAG	67	6	F	2011	R	F	66	150	45	15	Severely Underweight	Non	PostInfection	1	0	0	0	1	0	0	0	0	1	0	0	0	0	0	0	0	0	0	0	0	0	0	0	0	0	0	0	0	0	0	0
67G	GAGTGGTAGAGA	CCGTCAATTYMTTTRAGT	MID332	CCTACGGGAGGCAGCAG	67	8	G	2011	R	F	66	150	45	15	Severely Underweight	Non	PostInfection	1	0	0	0	1	0	0	0	0	1	0	0	0	0	0	0	0	0	0	0	0	0	0	0	0	0	0	0	0	0	0	0
67Ge	GAGACAGCTTGC	CCGTCAATTYMTTTRAGT	MID320	CCTACGGGAGGCAGCAG	67	7	FGe	2011	E	F	66	150	45	15	Severely Underweight	Non	PostInfection	1	0	0	0	1	0	0	0	0	1	0	0	0	0	0	0	0	0	0	0	0	0	0	0	NA	NA	NA	NA	NA	NA	NA	NA
68A	GATGATCGCCGA	CCGTCAATTYMTTTRAGT	MID344	CCTACGGGAGGCAGCAG	68	1	A	2011	B	F	56	173	50.9	14.711	Severely Underweight	Non	PCD	0	0	0	0	0	0	0	0	0	0	0	0	0	0	0	0	0	0	0	0	0	0	0	0	0	0	0	0	0	0	0	0
68B	GCAGGATAGATA	CCGTCAATTYMTTTRAGT	MID356	CCTACGGGAGGCAGCAG	68	2	B	2011	B	F	56	173	50.9	14.711	Severely Underweight	Non	PCD	0	0	0	0	0	0	0	0	0	0	0	0	0	0	0	0	0	0	0	0	0	0	0	0	0	0	0	0	0	0	0	0
68C	GCGACTTGTGTA	CCGTCAATTYMTTTRAGT	MID368	CCTACGGGAGGCAGCAG	68	3	Ce	2011	E	F	56	173	50.9	14.711	Severely Underweight	Non	PCD	0	0	0	0	0	0	0	0	0	0	0	0	0	0	0	0	0	0	0	0	0	0	0	0	0	0	0	0	0	0	0	0
68CDe	GCTCAGTGCAGA	CCGTCAATTYMTTTRAGT	MID380	CCTACGGGAGGCAGCAG	68	4	CDe	2011	E	F	56	173	50.9	14.711	Severely Underweight	Non	PCD	0	0	0	0	0	0	0	0	0	0	0	0	0	0	0	0	0	0	0	0	0	0	0	0	0	0	0	0	0	0	0	0
68D	GAAGTCTCGCAT	CCGTCAATTYMTTTRAGT	MID297	CCTACGGGAGGCAGCAG	68	5	D	2011	B	F	56	173	50.9	14.711	Severely Underweight	Non	PCD	1	0	0	0	0	0	0	0	0	1	0	0	0	0	0	0	0	0	0	0	0	0	0	0	0	0	0	0	0	0	0	0
68E	GACGCTAGTTCA	CCGTCAATTYMTTTRAGT	MID309	CCTACGGGAGGCAGCAG	68	6	E	2011	B	F	56	173	50.9	14.711	Severely Underweight	Non	PCD	0	0	0	0	0	0	0	0	0	0	0	0	0	0	0	0	0	0	0	0	0	0	0	0	0	0	0	0	0	0	0	0
68F	GAGAGAATGATC	CCGTCAATTYMTTTRAGT	MID321	CCTACGGGAGGCAGCAG	68	7	F	2011	B	F	56	173	50.9	14.711	Severely Underweight	Non	PCD	0	0	0	0	0	0	0	0	0	0	0	0	0	0	0	0	0	0	0	0	0	0	0	0	0	0	0	0	0	0	0	0
68G	GATACGTCCTGA	CCGTCAATTYMTTTRAGT	MID333	CCTACGGGAGGCAGCAG	68	8	G	2011	B	F	56	173	50.9	14.711	Severely Underweight	Non	PCD	0	0	0	0	0	0	0	0	0	0	0	0	0	0	0	0	0	0	0	0	0	0	0	0	0	0	0	0	0	0	0	0
69A	GATGCATGACGC	CCGTCAATTYMTTTRAGT	MID345	CCTACGGGAGGCAGCAG	69	1	A	2011	R	F	75	160	58.5	18.2812	Underweight	Non	Idiopathic	0	0	0	0	0	0	0	0	0	0	0	0	0	0	0	0	0	0	0	0	0	0	0	0	0	0	0	0	0	0	0	0
69B	GCAGGCAGTACT	CCGTCAATTYMTTTRAGT	MID357	CCTACGGGAGGCAGCAG	69	2	B	2011	B	F	75	160	58.5	18.2812	Underweight	Non	Idiopathic	0	0	0	0	0	0	0	0	0	0	0	0	0	0	0	0	0	0	0	0	0	0	0	0	0	0	0	0	0	0	0	0
69C	GCGAGATCCAGT	CCGTCAATTYMTTTRAGT	MID369	CCTACGGGAGGCAGCAG	69	3	C	2011	B	F	75	160	58.5	18.2812	Underweight	Non	Idiopathic	0	0	0	0	0	0	0	0	0	0	0	0	0	0	0	0	0	0	0	0	0	0	0	0	0	0	0	0	0	0	0	0
69D	GCTCGCTACTTC	CCGTCAATTYMTTTRAGT	MID381	CCTACGGGAGGCAGCAG	69	4	D	2011	B	F	75	160	58.5	18.2812	Underweight	Non	Idiopathic	0	0	0	0	0	0	0	0	0	0	0	0	0	0	0	0	0	0	0	0	0	0	0	0	0	0	0	0	0	0	0	0
69E	GAATGATGAGTG	CCGTCAATTYMTTTRAGT	MID298	CCTACGGGAGGCAGCAG	69	5	E	2011	B	F	75	160	58.5	18.2812	Underweight	Non	Idiopathic	0	0	0	0	0	0	0	0	0	0	0	0	0	0	0	0	0	0	0	0	0	0	0	0	1	0	0	0	0	0	0	0
69G	GACGTTGCACAG	CCGTCAATTYMTTTRAGT	MID310	CCTACGGGAGGCAGCAG	69	7	G	2011	T	F	75	160	58.5	18.2812	Underweight	Non	Idiopathic	0	0	0	0	0	0	0	0	0	0	0	0	0	0	0	0	0	0	0	0	0	0	0	0	0	0	0	0	0	0	0	0
70A	GAGAGCTCTACG	CCGTCAATTYMTTTRAGT	MID322	CCTACGGGAGGCAGCAG	70	1	A	2011	B	F	55	160	56.8	17.75	Underweight	Non	ABPA	1	0	0	0	1	0	0	0	0	1	0	0	0	0	0	0	0	0	0	0	0	0	0	0	0	0	0	0	0	0	0	0
70B	GATAGCTGTCTT	CCGTCAATTYMTTTRAGT	MID334	CCTACGGGAGGCAGCAG	70	2	B	2011	B	F	55	160	56.8	17.75	Underweight	Non	ABPA	1	0	0	0	1	0	0	0	0	1	0	0	0	0	0	0	0	0	0	0	0	0	0	0	0	0	0	0	0	0	0	0
70C	GATGTCGTGTCA	CCGTCAATTYMTTTRAGT	MID346	CCTACGGGAGGCAGCAG	70	3	Ce	2011	E	F	55	160	56.8	17.75	Underweight	Non	ABPA	1	0	0	0	1	0	0	0	0	1	0	0	0	0	0	0	0	0	0	0	0	0	0	0	0	0	0	0	0	0	0	0
70D	GCAGTATCACTG	CCGTCAATTYMTTTRAGT	MID358	CCTACGGGAGGCAGCAG	70	4	D	2011	R	F	55	160	56.8	17.75	Underweight	Non	ABPA	1	0	0	0	1	0	0	0	0	1	0	0	0	0	0	0	0	0	0	0	0	0	0	0	0	0	0	0	0	0	0	0
70E	GCGATATATCGC	CCGTCAATTYMTTTRAGT	MID370	CCTACGGGAGGCAGCAG	70	5	E	2011	B	F	55	160	56.8	17.75	Underweight	Non	ABPA	1	0	0	0	1	0	0	0	0	1	0	0	0	0	0	0	0	0	0	0	0	0	0	0	0	0	0	0	0	0	0	0
70F	GCTGATGAGCTG	CCGTCAATTYMTTTRAGT	MID382	CCTACGGGAGGCAGCAG	70	6	Fe	2011	E	F	55	160	56.8	17.75	Underweight	Non	ABPA	1	0	0	0	1	0	0	0	0	1	0	0	0	0	0	0	0	0	0	0	0	0	0	0	0	0	0	0	0	0	0	0
70G	GACACTCGAATC	CCGTCAATTYMTTTRAGT	MID299	CCTACGGGAGGCAGCAG	70	7	G	2011	B	F	55	160	56.8	17.75	Underweight	Non	ABPA	1	0	0	0	1	0	0	0	0	1	0	0	0	0	0	0	0	0	0	0	0	0	0	0	0	0	0	0	0	0	0	0
71A	GACTAACGTCAC	CCGTCAATTYMTTTRAGT	MID311	CCTACGGGAGGCAGCAG	71	1	Ae	2011	E	F	67	173.7	86.2	24.8129	Normal	Ex	PostInfection	0	0	0	0	0	0	0	0	0	0	0	0	0	0	0	0	0	0	0	0	0	0	0	0	0	0	0	0	0	0	0	0
71B	GAGATGCCGACT	CCGTCAATTYMTTTRAGT	MID323	CCTACGGGAGGCAGCAG	71	2	B	2011	R	F	67	173.7	86.2	24.8129	Normal	Ex	PostInfection	0	0	0	0	0	0	0	0	0	0	0	0	0	0	0	0	0	0	0	0	0	0	0	0	0	0	0	0	0	0	0	0
71C	GATAGTGCCACT	CCGTCAATTYMTTTRAGT	MID335	CCTACGGGAGGCAGCAG	71	3	C	2011	B	F	67	173.7	86.2	24.8129	Normal	Ex	PostInfection	0	0	0	0	0	0	0	0	0	0	0	0	0	0	0	0	0	0	0	0	0	0	0	0	0	0	0	0	0	0	0	0
71D	GATGTGAGCGCT	CCGTCAATTYMTTTRAGT	MID347	CCTACGGGAGGCAGCAG	71	4	De	2011	T	F	67	173.7	86.2	24.8129	Normal	Ex	PostInfection	0	0	0	0	0	0	0	0	0	0	0	0	0	0	0	0	0	0	0	0	0	0	0	0	0	0	0	0	0	0	0	0
71E	GCAGTTCATATC	CCGTCAATTYMTTTRAGT	MID359	CCTACGGGAGGCAGCAG	71	5	E	2011	B	F	67	173.7	86.2	24.8129	Normal	Ex	PostInfection	0	0	0	0	0	0	0	0	0	0	0	0	0	0	0	0	0	0	0	0	0	0	0	0	0	0	0	0	0	0	0	0
71F	GCGGATGTGACT	CCGTCAATTYMTTTRAGT	MID371	CCTACGGGAGGCAGCAG	71	6	F	2011	R	F	67	173.7	86.2	24.8129	Normal	Ex	PostInfection	0	0	0	0	0	0	0	0	0	0	0	0	0	0	0	0	0	0	0	0	0	0	0	0	0	0	0	0	0	0	0	0
71G	GCTGCTGCAATA	CCGTCAATTYMTTTRAGT	MID383	CCTACGGGAGGCAGCAG	71	7	G	2011	B	F	67	173.7	86.2	24.8129	Normal	Ex	PostInfection	0	0	0	0	0	0	0	0	0	0	0	0	0	0	0	0	0	0	0	0	0	0	0	0	0	0	0	0	0	0	0	0
72A	GACAGCGTTGAC	CCGTCAATTYMTTTRAGT	MID300	CCTACGGGAGGCAGCAG	72	1	A	2011	B	F	29	157	63	20.0637	Normal	Non	PCD	0	0	0	0	0	0	0	0	0	0	0	0	0	0	0	0	0	0	0	0	0	0	0	0	0	0	0	0	0	0	0	0
72B	GACTAGACCAGC	CCGTCAATTYMTTTRAGT	MID312	CCTACGGGAGGCAGCAG	72	2	B	2011	B	F	29	157	63	20.0637	Normal	Non	PCD	0	0	0	0	0	0	0	0	0	0	0	0	0	0	0	0	0	0	0	0	0	0	0	0	0	0	0	0	0	0	0	0
72C	GAGCAGATGCCT	CCGTCAATTYMTTTRAGT	MID324	CCTACGGGAGGCAGCAG	72	3	C	2011	R	F	29	157	63	20.0637	Normal	Non	PCD	0	0	0	0	0	0	0	0	0	0	0	0	0	0	0	0	0	0	0	0	0	0	0	0	0	0	0	0	0	0	0	0
72D	GATATGCGGCTG	CCGTCAATTYMTTTRAGT	MID336	CCTACGGGAGGCAGCAG	72	4	D	2011	B	F	29	157	63	20.0637	Normal	Non	PCD	0	0	0	0	0	0	0	0	0	0	0	0	0	0	0	0	0	0	0	0	0	0	0	0	0	0	0	0	0	0	0	0
72E	GATTAGCACTCT	CCGTCAATTYMTTTRAGT	MID348	CCTACGGGAGGCAGCAG	72	5	E	2011	B	F	29	157	63	20.0637	Normal	Non	PCD	0	0	0	0	0	0	0	0	0	0	0	0	0	0	0	0	0	0	0	0	0	0	0	0	0	0	0	0	0	0	0	0
72F	GCATAGTAGCCG	CCGTCAATTYMTTTRAGT	MID360	CCTACGGGAGGCAGCAG	72	6	F	2011	R	F	29	157	63	20.0637	Normal	Non	PCD	0	0	0	0	0	0	0	0	0	0	0	0	0	0	0	0	0	0	0	0	0	0	0	0	0	0	0	0	0	0	0	0
72G	GCGTACAACTGT	CCGTCAATTYMTTTRAGT	MID372	CCTACGGGAGGCAGCAG	72	7	G	2011	B	F	29	157	63	20.0637	Normal	Non	PCD	0	0	0	0	0	0	0	0	0	0	0	0	0	0	0	0	0	0	0	0	0	0	0	0	0	0	0	0	0	0	0	0
73A	GCTGTAGTATGC	CCGTCAATTYMTTTRAGT	MID385	CCTACGGGAGGCAGCAG	73	1	A	2011	B	M	60	168	106	31.5476	Obese	Ex	PostInfection	1	0	0	0	0	0	0	0	0	1	0	0	0	0	0	0	0	0	0	0	1	0	0	0	0	0	0	0	0	0	0	0
73B	GGTCACTGACAG	CCGTCAATTYMTTTRAGT	MID397	CCTACGGGAGGCAGCAG	73	2	B	2011	B	M	60	168	106	31.5476	Obese	Ex	PostInfection	1	0	0	0	0	0	0	0	0	1	0	0	0	0	0	0	0	0	0	0	1	0	0	0	0	0	0	0	0	0	0	0
73C	GTAGTGTCTAGC	CCGTCAATTYMTTTRAGT	MID409	CCTACGGGAGGCAGCAG	73	3	Ce	2011	E	M	60	168	106	31.5476	Obese	Ex	PostInfection	1	0	0	0	0	0	0	0	0	1	0	0	0	0	0	0	0	0	0	0	1	0	0	0	0	0	0	0	0	0	0	0
73D	GTCGCTGTCTTC	CCGTCAATTYMTTTRAGT	MID421	CCTACGGGAGGCAGCAG	73	4	D	2011	R	M	60	168	106	31.5476	Obese	Ex	PostInfection	1	0	0	0	0	0	0	0	0	1	0	0	0	0	0	0	0	0	0	0	1	0	0	0	0	0	0	0	0	0	0	0
73E	GTGAGGTCGCTA	CCGTCAATTYMTTTRAGT	MID433	CCTACGGGAGGCAGCAG	73	5	Ee	2011	E	M	60	168	106	31.5476	Obese	Ex	PostInfection	1	0	0	0	0	0	0	0	0	1	0	0	0	0	0	0	0	0	0	0	1	0	0	0	0	0	0	0	0	0	0	0
73G	GTTGACGACAGC	CCGTCAATTYMTTTRAGT	MID445	CCTACGGGAGGCAGCAG	73	7	Ge	2011	E	M	60	168	106	31.5476	Obese	Ex	PostInfection	1	0	0	0	0	0	0	0	0	1	0	0	0	0	0	0	0	0	0	0	1	0	0	0	0	0	0	0	0	0	0	0
74A	TACGCGCTGAGA	CCGTCAATTYMTTTRAGT	MID457	CCTACGGGAGGCAGCAG	74	1	A	2011	B	F	61	166	69	20.7831	Normal	Non	Idiopathic	0	0	0	0	0	0	0	0	0	0	0	0	0	0	0	0	0	0	0	0	0	0	0	0	0	0	0	0	0	0	0	0
74B	TAGATCCTCGAT	CCGTCAATTYMTTTRAGT	MID469	CCTACGGGAGGCAGCAG	74	2	B	2011	B	F	61	166	69	20.7831	Normal	Non	Idiopathic	0	0	0	0	0	0	0	0	0	0	0	0	0	0	0	0	0	0	0	0	0	0	0	0	0	0	0	0	0	0	0	0
74D	GCTGTGTAGGAC	CCGTCAATTYMTTTRAGT	MID386	CCTACGGGAGGCAGCAG	74	4	D	2011	B	F	61	166	69	20.7831	Normal	Non	Idiopathic	0	0	0	0	0	0	0	0	0	0	0	0	0	0	0	0	0	0	0	0	0	0	0	0	0	0	0	0	0	0	0	0
74E	GGTCGTAGCGTA	CCGTCAATTYMTTTRAGT	MID398	CCTACGGGAGGCAGCAG	74	5	E	2011	R	F	61	166	69	20.7831	Normal	Non	Idiopathic	0	0	0	0	0	0	0	0	0	0	0	0	0	0	0	0	0	0	0	0	0	0	0	0	0	0	0	0	0	0	0	0
74G	GTATATCCGCAG	CCGTCAATTYMTTTRAGT	MID410	CCTACGGGAGGCAGCAG	74	7	G	2012	B	F	61	166	69	20.7831	Normal	Non	Idiopathic	0	0	0	0	0	0	0	0	0	0	0	0	0	0	0	0	0	0	0	0	0	0	0	0	0	0	0	0	0	0	0	0
75A	GTCGTAGCCAGA	CCGTCAATTYMTTTRAGT	MID422	CCTACGGGAGGCAGCAG	75	1	Ae	2011	E	F	64	164	58	17.6829	Underweight	Non	PostInfection	0	0	0	0	0	0	0	0	0	0	0	0	0	0	0	0	0	0	0	0	0	0	0	0	0	0	0	0	0	0	0	0
75B	GTGATAGTGCCG	CCGTCAATTYMTTTRAGT	MID434	CCTACGGGAGGCAGCAG	75	2	B	2011	R	F	64	164	58	17.6829	Underweight	Non	PostInfection	0	0	0	0	0	0	0	0	0	0	0	0	0	0	0	0	0	0	0	0	0	0	0	0	0	0	0	0	0	0	0	0
75C	GTTGTATACTCG	CCGTCAATTYMTTTRAGT	MID446	CCTACGGGAGGCAGCAG	75	3	C	2011	B	F	64	164	58	17.6829	Underweight	Non	PostInfection	0	0	0	0	0	0	0	0	0	0	0	0	0	0	0	0	0	0	0	0	0	0	0	0	0	0	0	0	0	0	0	0
75D	TACGGTATGTCT	CCGTCAATTYMTTTRAGT	MID458	CCTACGGGAGGCAGCAG	75	4	D	2011	B	F	64	164	58	17.6829	Underweight	Non	PostInfection	0	0	0	0	0	0	0	0	0	0	0	0	0	0	0	0	0	0	0	0	0	0	0	0	0	0	0	0	0	0	0	0
75E	TAGCACACCTAT	CCGTCAATTYMTTTRAGT	MID470	CCTACGGGAGGCAGCAG	75	5	E	2011	B	F	64	164	58	17.6829	Underweight	Non	PostInfection	0	0	0	0	0	0	0	0	0	0	0	0	0	0	0	0	0	0	0	0	0	0	0	0	0	0	0	0	0	0	0	0
75F	GCTTACATCGAG	CCGTCAATTYMTTTRAGT	MID387	CCTACGGGAGGCAGCAG	75	6	Fe	2011	E	F	64	164	58	17.6829	Underweight	Non	PostInfection	0	0	0	0	0	0	0	0	0	0	0	0	0	0	0	0	0	0	0	0	0	0	0	0	0	0	0	0	0	0	0	0
75G	GGTGCGTGTATG	CCGTCAATTYMTTTRAGT	MID399	CCTACGGGAGGCAGCAG	75	7	G	2011	R	F	64	164	58	17.6829	Underweight	Non	PostInfection	0	0	0	0	0	0	0	0	0	0	0	0	0	0	0	0	0	0	0	0	0	0	0	0	0	0	0	0	0	0	0	0
76A	GTATCCATGCGA	CCGTCAATTYMTTTRAGT	MID411	CCTACGGGAGGCAGCAG	76	1	A	2011	B	F	69	168	49.9	14.8512	Severely Underweight	Non	Idiopathic	0	0	0	0	0	0	0	0	0	0	0	0	0	0	0	0	0	0	0	0	0	0	0	0	0	0	0	0	0	0	0	0
76B	GTCGTGTGTCAA	CCGTCAATTYMTTTRAGT	MID423	CCTACGGGAGGCAGCAG	76	2	B	2011	B	F	69	168	49.9	14.8512	Severely Underweight	Non	Idiopathic	0	0	0	0	0	0	0	0	0	0	0	0	0	0	0	0	0	0	0	0	0	0	0	0	0	0	0	0	0	0	0	0
76C	GTGCAATCGACG	CCGTCAATTYMTTTRAGT	MID435	CCTACGGGAGGCAGCAG	76	3	C	2011	B	F	69	168	49.9	14.8512	Severely Underweight	Non	Idiopathic	0	0	0	0	0	0	0	0	0	0	0	0	0	0	0	0	0	0	0	0	0	0	0	0	0	0	0	0	0	0	0	0
76D	TAACAGTCGCTG	CCGTCAATTYMTTTRAGT	MID447	CCTACGGGAGGCAGCAG	76	4	D	2011	B	F	69	168	49.9	14.8512	Severely Underweight	Non	Idiopathic	0	0	0	0	0	0	0	0	0	0	0	0	0	0	0	0	0	0	0	0	0	0	0	0	0	0	0	0	0	0	0	0
76E	TACGTGTACGTG	CCGTCAATTYMTTTRAGT	MID459	CCTACGGGAGGCAGCAG	76	5	E	2011	B	F	69	168	49.9	14.8512	Severely Underweight	Non	Idiopathic	0	0	0	0	0	0	0	0	0	0	0	0	0	0	0	0	0	0	0	0	0	0	0	0	0	0	0	0	0	0	0	0
76EFe	TAGCATCGTGGT	CCGTCAATTYMTTTRAGT	MID471	CCTACGGGAGGCAGCAG	76	6	EFe	2011	E	F	69	168	49.9	14.8512	Severely Underweight	Non	Idiopathic	0	0	0	0	0	0	0	0	0	0	0	0	0	0	0	0	0	0	0	0	0	0	0	0	0	0	0	0	0	0	0	0
76H	GTACAAGAGTGA	CCGTCAATTYMTTTRAGT	MID400	CCTACGGGAGGCAGCAG	76	8	G	2011	B	F	69	168	49.9	14.8512	Severely Underweight	Non	Idiopathic	0	0	0	0	0	0	0	0	0	0	0	0	0	0	0	0	0	0	0	0	0	0	0	0	0	0	0	0	0	0	0	0
76Ge	GCTTCATAGTGT	CCGTCAATTYMTTTRAGT	MID388	CCTACGGGAGGCAGCAG	76	9	Ge	2011	E	F	69	168	49.9	14.8512	Severely Underweight	Non	Idiopathic	0	0	0	0	0	0	0	0	0	0	0	0	0	0	0	0	0	0	0	0	0	0	0	0	0	0	0	0	0	0	0	0
77A	GTATGACTGGCT	CCGTCAATTYMTTTRAGT	MID412	CCTACGGGAGGCAGCAG	77	1	A	2011	B	M	64	175	78.1	22.3143	Normal	Non	Idiopathic	0	0	0	0	0	0	0	0	0	0	0	0	0	0	0	0	0	0	0	0	0	0	0	0	0	0	0	0	0	0	0	0
77B	GTCTACACACAT	CCGTCAATTYMTTTRAGT	MID424	CCTACGGGAGGCAGCAG	77	2	B	2011	B	M	64	175	78.1	22.3143	Normal	Non	Idiopathic	0	0	0	0	0	0	0	0	0	0	0	0	0	0	0	0	0	0	0	0	0	0	0	0	0	0	0	0	0	0	0	0
77C	GTGCACATTATC	CCGTCAATTYMTTTRAGT	MID436	CCTACGGGAGGCAGCAG	77	3	C	2011	B	M	64	175	78.1	22.3143	Normal	Non	Idiopathic	0	0	0	0	0	0	0	0	0	0	0	0	0	0	0	0	0	0	0	0	0	0	0	0	0	0	0	0	0	0	0	0
77D	TAACTCTGATGC	CCGTCAATTYMTTTRAGT	MID448	CCTACGGGAGGCAGCAG	77	4	D	2011	B	M	64	175	78.1	22.3143	Normal	Non	Idiopathic	0	0	0	0	0	0	0	0	0	0	0	0	0	0	0	0	0	0	0	0	0	0	0	0	0	0	0	0	0	0	0	0
77E	TACTAATCTGCG	CCGTCAATTYMTTTRAGT	MID460	CCTACGGGAGGCAGCAG	77	5	E	2011	B	M	64	175	78.1	22.3143	Normal	Non	Idiopathic	0	0	0	0	0	0	0	0	0	0	0	0	0	0	0	0	0	0	0	0	0	0	0	0	1	0	0	0	0	0	0	0
77F	TAGCCTCTCTGC	CCGTCAATTYMTTTRAGT	MID472	CCTACGGGAGGCAGCAG	77	6	F	2011	B	M	64	175	78.1	22.3143	Normal	Non	Idiopathic	0	0	0	0	0	0	0	0	0	0	0	0	0	0	0	0	0	0	0	0	0	0	0	0	0	0	0	0	0	0	0	0
77G	GCTTGCGAGACA	CCGTCAATTYMTTTRAGT	MID389	CCTACGGGAGGCAGCAG	77	7	G	2011	B	M	64	175	78.1	22.3143	Normal	Non	Idiopathic	0	0	0	0	0	0	0	0	0	0	0	0	0	0	0	0	0	0	0	0	0	0	0	0	0	0	0	0	0	0	0	0
78A	GTACGGCATACG	CCGTCAATTYMTTTRAGT	MID401	CCTACGGGAGGCAGCAG	78	1	A	2011	B	F	72	152	52.6	17.3026	Underweight	Non	PostInfection	1	0	0	0	0	0	0	0	0	1	0	0	0	0	0	0	0	0	0	0	0	0	0	0	0	0	0	0	0	0	0	0
78B	GTATGCGCTGTA	CCGTCAATTYMTTTRAGT	MID413	CCTACGGGAGGCAGCAG	78	2	B	2011	B	F	72	152	52.6	17.3026	Underweight	Non	PostInfection	1	0	0	0	0	0	0	0	0	1	0	0	0	0	0	0	0	0	0	0	0	0	0	0	0	0	0	0	0	0	0	0
78C	GTCTATCGGAGT	CCGTCAATTYMTTTRAGT	MID425	CCTACGGGAGGCAGCAG	78	3	C	2011	B	F	72	152	52.6	17.3026	Underweight	Non	PostInfection	1	0	0	0	0	0	0	0	0	1	0	0	0	0	0	0	0	0	0	0	0	0	0	0	0	0	0	0	0	0	0	0
78D	GTGGCGATACAC	CCGTCAATTYMTTTRAGT	MID437	CCTACGGGAGGCAGCAG	78	4	D	2011	B	F	72	152	52.6	17.3026	Underweight	Non	PostInfection	1	0	0	0	0	0	0	0	0	1	0	0	0	0	0	0	0	0	0	0	0	0	0	0	0	0	0	0	0	0	0	0
78E	TAAGCGCAGCAC	CCGTCAATTYMTTTRAGT	MID449	CCTACGGGAGGCAGCAG	78	5	E	2011	B	F	72	152	52.6	17.3026	Underweight	Non	PostInfection	1	0	0	0	0	0	0	0	0	1	0	0	0	0	0	0	0	0	0	0	0	0	0	0	0	0	0	0	0	0	0	0
78F	TACTACATGGTC	CCGTCAATTYMTTTRAGT	MID461	CCTACGGGAGGCAGCAG	78	6	F	2011	B	F	72	152	52.6	17.3026	Underweight	Non	PostInfection	1	0	0	0	0	0	0	0	0	1	0	0	0	0	0	0	0	0	0	0	0	0	0	0	0	0	0	0	0	0	0	0
78G	TAGCGACATCTG	CCGTCAATTYMTTTRAGT	MID473	CCTACGGGAGGCAGCAG	78	7	G	2011	B	F	72	152	52.6	17.3026	Underweight	Non	PostInfection	1	0	0	0	0	0	0	0	0	1	0	0	0	0	0	0	0	0	0	0	0	0	0	0	0	0	0	0	0	0	0	0
79A	GTACTCTAGACT	CCGTCAATTYMTTTRAGT	MID402	CCTACGGGAGGCAGCAG	79	1	A	2011	R	F	33	157	56	17.8344	Underweight	Smoker	PCD	0	0	0	0	0	0	0	0	0	0	0	0	0	0	0	0	0	0	0	0	0	0	0	0	0	0	0	0	0	0	0	0
79B	GTATGTTGCTCA	CCGTCAATTYMTTTRAGT	MID414	CCTACGGGAGGCAGCAG	79	2	B	2011	R	F	33	157	56	17.8344	Underweight	Smoker	PCD	0	0	0	0	0	0	0	0	0	0	0	0	0	0	0	0	0	0	0	0	0	0	0	0	0	0	0	0	0	0	0	0
79C	GTCTCATGTAGG	CCGTCAATTYMTTTRAGT	MID426	CCTACGGGAGGCAGCAG	79	3	C	2011	B	F	33	157	56	17.8344	Underweight	Smoker	PCD	0	0	0	0	0	0	0	0	0	0	0	0	0	0	0	0	0	0	0	0	0	0	0	0	0	0	0	0	0	0	0	0
79D	GTGTACCTATCA	CCGTCAATTYMTTTRAGT	MID438	CCTACGGGAGGCAGCAG	79	4	De	2011	E	F	33	157	56	17.8344	Underweight	Smoker	PCD	0	0	0	0	0	0	0	0	0	0	0	0	0	0	0	0	0	0	0	0	0	0	0	0	0	0	0	0	0	0	0	0
79E	TACACACATGGC	CCGTCAATTYMTTTRAGT	MID450	CCTACGGGAGGCAGCAG	79	5	E	2011	R	F	33	157	56	17.8344	Underweight	Smoker	PCD	0	0	0	0	0	0	0	0	0	0	0	0	0	0	0	0	0	0	0	0	0	0	0	0	0	0	0	0	0	0	0	0
79F	TACTGCGACAGT	CCGTCAATTYMTTTRAGT	MID462	CCTACGGGAGGCAGCAG	79	6	F	2011	R	F	33	157	56	17.8344	Underweight	Smoker	PCD	0	0	0	0	0	0	0	0	0	0	0	0	0	0	0	0	0	0	0	0	0	0	0	0	0	0	0	0	0	0	0	0
79G	TAGCGGATCACG	CCGTCAATTYMTTTRAGT	MID474	CCTACGGGAGGCAGCAG	79	7	Ge	2011	T	F	33	157	56	17.8344	Underweight	Smoker	PCD	0	0	0	0	0	0	0	0	0	0	0	0	0	0	0	0	0	0	0	0	0	0	0	0	0	0	0	0	0	0	0	0
80A	GGATCGCAGATC	CCGTCAATTYMTTTRAGT	MID391	CCTACGGGAGGCAGCAG	80	1	A	2011	B	F	74	167	73.6	22.0359	Normal	Non	Idiopathic	1	0	0	0	0	0	0	0	0	0	0	1	0	0	0	0	0	0	0	0	0	0	0	0	0	0	0	0	0	0	0	0
80B	GTAGACTGCGTG	CCGTCAATTYMTTTRAGT	MID403	CCTACGGGAGGCAGCAG	80	2	B	2011	B	F	74	167	73.6	22.0359	Normal	Non	Idiopathic	1	0	0	0	0	0	0	0	0	0	0	1	0	0	0	0	0	0	0	0	0	0	0	0	0	0	0	0	0	0	0	0
80C	GTCAACGCGATG	CCGTCAATTYMTTTRAGT	MID415	CCTACGGGAGGCAGCAG	80	3	C	2011	B	F	74	167	73.6	22.0359	Normal	Non	Idiopathic	1	0	0	0	0	0	0	0	0	0	0	1	0	0	0	0	0	0	0	0	0	0	0	0	0	0	0	0	0	0	0	0
80D	GTCTCTCTACGC	CCGTCAATTYMTTTRAGT	MID427	CCTACGGGAGGCAGCAG	80	4	D	2011	B	F	74	167	73.6	22.0359	Normal	Non	Idiopathic	1	0	0	0	0	0	0	0	0	0	0	1	0	0	0	0	0	0	0	0	0	0	0	0	0	0	0	0	0	0	0	0
80E	GTGTCTACATTG	CCGTCAATTYMTTTRAGT	MID439	CCTACGGGAGGCAGCAG	80	5	E	2011	B	F	74	167	73.6	22.0359	Normal	Non	Idiopathic	1	0	0	0	0	0	0	0	0	0	0	1	0	0	0	0	0	0	0	0	0	0	0	0	0	0	0	0	0	0	0	0
80F	TACACGATCTAC	CCGTCAATTYMTTTRAGT	MID451	CCTACGGGAGGCAGCAG	80	6	F	2011	B	F	74	167	73.6	22.0359	Normal	Non	Idiopathic	1	0	0	0	0	0	0	0	0	0	0	1	0	0	0	0	0	0	0	0	0	0	0	0	0	0	0	0	0	0	0	0
80G	TACTGGACGCGA	CCGTCAATTYMTTTRAGT	MID463	CCTACGGGAGGCAGCAG	80	7	G	2011	R	F	74	167	73.6	22.0359	Normal	Non	Idiopathic	0	0	0	0	0	0	0	0	0	0	0	0	0	0	0	0	0	0	0	0	0	0	0	0	0	0	0	0	0	0	0	0
81A	TAGCTCGTAACT	CCGTCAATTYMTTTRAGT	MID475	CCTACGGGAGGCAGCAG	81	1	A	2011	B	F	63	167	62	18.5629	Normal	Non	PostInfection	0	0	0	0	0	0	0	0	0	0	0	0	0	0	0	0	0	0	0	0	0	0	0	0	0	0	0	0	0	0	0	0
81B	GGCAGTGTATCG	CCGTCAATTYMTTTRAGT	MID392	CCTACGGGAGGCAGCAG	81	2	B	2011	B	F	63	167	62	18.5629	Normal	Non	PostInfection	0	0	0	0	0	0	0	0	0	0	0	0	0	0	0	0	0	0	0	0	0	0	0	0	0	0	0	0	0	0	0	0
81C	GTAGAGCTGTTC	CCGTCAATTYMTTTRAGT	MID404	CCTACGGGAGGCAGCAG	81	3	C	2011	B	F	63	167	62	18.5629	Normal	Non	PostInfection	0	0	0	0	0	0	0	0	0	0	0	0	0	0	0	0	0	0	0	0	0	0	0	0	0	0	0	0	0	0	0	0
81D	GTCACGACTATT	CCGTCAATTYMTTTRAGT	MID416	CCTACGGGAGGCAGCAG	81	4	D	2011	B	F	63	167	62	18.5629	Normal	Non	PostInfection	0	0	0	0	0	0	0	0	0	0	0	0	0	0	0	0	0	0	0	0	0	0	0	0	0	0	0	0	0	0	0	0
81E	GTCTGACAGTTG	CCGTCAATTYMTTTRAGT	MID428	CCTACGGGAGGCAGCAG	81	5	E	2011	B	F	63	167	62	18.5629	Normal	Non	PostInfection	0	0	0	0	0	0	0	0	0	0	0	0	0	0	0	0	0	0	0	0	0	0	0	0	0	0	0	0	0	0	0	0
81F	GTGTGCTATCAG	CCGTCAATTYMTTTRAGT	MID440	CCTACGGGAGGCAGCAG	81	6	F	2011	B	F	63	167	62	18.5629	Normal	Non	PostInfection	0	0	0	0	0	0	0	0	0	0	0	0	0	0	0	0	0	0	0	0	0	0	0	0	0	0	0	0	0	0	0	0
81G	TACAGATGGCTC	CCGTCAATTYMTTTRAGT	MID452	CCTACGGGAGGCAGCAG	81	7	G	2011	B	F	63	167	62	18.5629	Normal	Non	PostInfection	0	0	0	0	0	0	0	0	0	0	0	0	0	0	0	0	0	0	0	0	0	0	0	0	0	0	0	0	0	0	0	0
82A	TACTTACTGCAG	CCGTCAATTYMTTTRAGT	MID464	CCTACGGGAGGCAGCAG	82	1	A	2011	B	M	60	171	76.2	22.2807	Normal	NA	ABPA	1	0	0	0	1	0	0	0	0	0	0	0	0	0	0	0	0	0	0	0	1	0	0	0	0	0	0	0	0	0	0	0
82B	TAGCTGAGTCCA	CCGTCAATTYMTTTRAGT	MID476	CCTACGGGAGGCAGCAG	82	2	B	2011	B	M	60	171	76.2	22.2807	Normal	NA	ABPA	1	0	0	0	1	0	0	0	0	0	0	0	0	0	0	0	0	0	0	0	1	0	0	0	0	0	0	0	0	0	0	0
82C	GGCGACATGTAC	CCGTCAATTYMTTTRAGT	MID393	CCTACGGGAGGCAGCAG	82	3	C	2011	B	M	60	171	76.2	22.2807	Normal	NA	ABPA	1	0	0	0	1	0	0	0	0	0	0	0	0	0	0	0	0	0	0	0	1	0	0	0	0	0	0	0	0	0	0	0
82D	GTAGATGCTTCG	CCGTCAATTYMTTTRAGT	MID405	CCTACGGGAGGCAGCAG	82	4	De	2011	T	M	60	171	76.2	22.2807	Normal	NA	ABPA	1	0	0	0	1	0	0	0	0	0	0	0	0	0	0	0	0	0	0	0	1	0	0	0	0	0	0	0	0	0	0	0
82E	GTCATATCGTAC	CCGTCAATTYMTTTRAGT	MID417	CCTACGGGAGGCAGCAG	82	5	E	2011	R	M	60	171	76.2	22.2807	Normal	NA	ABPA	1	0	0	0	1	0	0	0	0	0	0	0	0	0	0	0	0	0	0	0	1	0	0	0	0	0	0	0	0	0	0	0
82F	GTCTGGATAGCG	CCGTCAATTYMTTTRAGT	MID429	CCTACGGGAGGCAGCAG	82	6	Fe	2011	T	M	60	171	76.2	22.2807	Normal	NA	ABPA	1	0	0	0	1	0	0	0	0	0	0	0	0	0	0	0	0	0	0	0	1	0	0	0	0	0	0	0	0	0	0	0
82G	GTGTGTGTCAGG	CCGTCAATTYMTTTRAGT	MID441	CCTACGGGAGGCAGCAG	82	7	Ge	2012	E	M	60	171	76.2	22.2807	Normal	NA	ABPA	1	0	0	0	1	0	0	0	0	0	0	0	0	0	0	0	0	0	0	0	1	0	0	0	0	0	0	0	0	0	0	0
83A	TACAGTCTCATG	CCGTCAATTYMTTTRAGT	MID453	CCTACGGGAGGCAGCAG	83	1	A	2011	B	M	55	185	61.3	16.5676	Underweight	Non	Idiopathic	0	0	0	0	0	0	0	0	0	0	0	0	0	0	0	0	0	0	0	0	0	0	0	0	1	1	0	0	0	0	0	0
83B	TACTTCGCTCGC	CCGTCAATTYMTTTRAGT	MID465	CCTACGGGAGGCAGCAG	83	2	B	2011	B	M	55	185	61.3	16.5676	Underweight	Non	Idiopathic	0	0	0	0	0	0	0	0	0	0	0	0	0	0	0	0	0	0	0	0	0	0	0	0	1	0	0	0	0	0	0	0
83C	TAGGTATCTCAC	CCGTCAATTYMTTTRAGT	MID477	CCTACGGGAGGCAGCAG	83	3	C	2011	B	M	55	185	61.3	16.5676	Underweight	Non	Idiopathic	0	0	0	0	0	0	0	0	0	0	0	0	0	0	0	0	0	0	0	0	0	0	0	0	0	0	0	0	0	0	0	0
83D	GGCGTACTGATG	CCGTCAATTYMTTTRAGT	MID394	CCTACGGGAGGCAGCAG	83	4	D	2011	B	M	55	185	61.3	16.5676	Underweight	Non	Idiopathic	0	0	0	0	0	0	0	0	0	0	0	0	0	0	0	0	0	0	0	0	0	0	0	0	0	0	0	0	0	0	0	0
83E	GTAGCAACGTCT	CCGTCAATTYMTTTRAGT	MID406	CCTACGGGAGGCAGCAG	83	5	E	2011	B	M	55	185	61.3	16.5676	Underweight	Non	Idiopathic	0	0	0	0	0	0	0	0	0	0	0	0	0	0	0	0	0	0	0	0	0	0	0	0	1	0	0	1	0	0	0	0
83F	GTCATTCACGAG	CCGTCAATTYMTTTRAGT	MID418	CCTACGGGAGGCAGCAG	83	6	F	2011	B	M	55	185	61.3	16.5676	Underweight	Non	Idiopathic	0	0	0	0	0	0	0	0	0	0	0	0	0	0	0	0	0	0	0	0	0	0	0	0	0	0	0	0	0	0	0	0
83G	GTCTTCGTCGCT	CCGTCAATTYMTTTRAGT	MID430	CCTACGGGAGGCAGCAG	83	7	G	2011	B	M	55	185	61.3	16.5676	Underweight	Non	Idiopathic	0	0	0	0	0	0	0	0	0	0	0	0	0	0	0	0	0	0	0	0	0	0	0	0	0	0	0	0	0	0	0	0
84D	GTGTTGCAGCAT	CCGTCAATTYMTTTRAGT	MID442	CCTACGGGAGGCAGCAG	84	4	D	2011	R	F	59	162	71.8	22.1605	Normal	Non	Idiopathic	0	0	0	0	0	0	0	0	0	0	0	0	0	0	0	0	0	0	0	0	0	0	0	0	0	0	0	0	0	0	0	0
84F	TACATCACCACA	CCGTCAATTYMTTTRAGT	MID454	CCTACGGGAGGCAGCAG	84	6	F	2011	B	F	59	162	71.8	22.1605	Normal	Non	Idiopathic	0	0	0	0	0	0	0	0	0	0	0	0	0	0	0	0	0	0	0	0	0	0	0	0	0	0	0	0	0	0	0	0
84G	TAGACTGTACTC	CCGTCAATTYMTTTRAGT	MID466	CCTACGGGAGGCAGCAG	84	7	G	2011	B	F	59	162	71.8	22.1605	Normal	Non	Idiopathic	0	0	0	0	0	0	0	0	0	0	0	0	0	0	0	0	0	0	0	0	0	0	0	0	0	0	0	0	0	0	0	0
85A	TAGTCGTCTAGT	CCGTCAATTYMTTTRAGT	MID478	CCTACGGGAGGCAGCAG	85	1	Ae	2011	E	F	38	160	78.5	24.5312	Normal	Ex	PCD	0	0	0	0	0	0	0	0	0	0	0	0	0	0	0	0	0	0	0	0	0	0	0	0	0	0	0	0	0	0	0	0
85B	GGCTATGACATC	CCGTCAATTYMTTTRAGT	MID395	CCTACGGGAGGCAGCAG	85	2	B	2011	R	F	38	160	78.5	24.5312	Normal	Ex	PCD	0	0	0	0	0	0	0	0	0	0	0	0	0	0	0	0	0	0	0	0	0	0	0	0	0	0	0	0	0	0	0	0
85C	GTAGCGCGAGTT	CCGTCAATTYMTTTRAGT	MID407	CCTACGGGAGGCAGCAG	85	3	C	2011	B	F	38	160	78.5	24.5312	Normal	Ex	PCD	0	0	0	0	0	0	0	0	0	0	0	0	0	0	0	0	0	0	0	0	0	0	0	0	1	1	1	0	0	0	0	0
85D	GTCCATAGCTAG	CCGTCAATTYMTTTRAGT	MID419	CCTACGGGAGGCAGCAG	85	4	D	2011	R	F	38	160	78.5	24.5312	Normal	Ex	PCD	0	0	0	0	0	0	0	0	0	0	0	0	0	0	0	0	0	0	0	0	0	0	0	0	0	0	0	0	0	0	0	0
85Ee	GTGACCTGATGT	CCGTCAATTYMTTTRAGT	MID431	CCTACGGGAGGCAGCAG	85	5	Ee	2011	T	F	38	160	78.5	24.5312	Normal	Ex	PCD	0	0	0	0	0	0	0	0	0	0	0	0	0	0	0	0	0	0	0	0	0	0	0	0	0	0	0	0	0	0	0	0
85F	GTTAGAGCACTC	CCGTCAATTYMTTTRAGT	MID443	CCTACGGGAGGCAGCAG	85	6	F	2011	B	F	38	160	78.5	24.5312	Normal	Ex	PCD	0	0	0	0	0	0	0	0	0	0	0	0	0	0	0	0	0	0	0	0	0	0	0	0	0	0	0	0	0	0	0	0
[truncated: 83 more columns]

## Sheet: Final variable list
Variable	Value	Description
#SampleID	Text	Unique identifier required by QIIME
BarcodeSequence	Text	Unique barcode encoded into DNA by fusion primer required by QIIME
LinkerPrimerSequence	Text	Linker sequence and forward primer sequence required by QIIME
MID	Text	Name of the barcode for lab reference
ReversePrimer	Text	Reverse primer sequence for removal in QIIME
SequenceCount	Text	Unrarefied number of reads identified for that sample after demultiplexing and denoising
StudyNumber	Numeric	LAMB Patient study number
SampleOrder	Numeric	Number that indicates the sequence of sampling within a patient as visit letter has occasional errors
VisitLetter	Text	Letter indicating visit since enrolment. A to H with exacerbation samples indicated by e and those between visits indicated by both letters of the visit (e.g. BCe)
Exacerbation	Binary (0/1)	Exacerbation at time of sampling
Date	Date	Date of sample
Year	Year	Year of sample (used to calculate time since first isolation)
Pilot	Text	Plate number in pilot sequencing (see also Daniel Homola MSc project)
TotalExac	Numeric	Total exacerbations since start of study
BETR	Factor (B,E,T,R)	Classification of sample as taken during baseline (B), exacerbation (E), exacerbation and treatment (T) or recovery (R) as per LiPuma
Sex	Factor (M,F)	M (Male) or F (Female)
Age	Numeric	Age in years
Height	Numeric	Height in cm
Weight	Numeric	Weight in kg
BMI	Numeric	Body mass index
BMIClass	Factor (Severely Obese, Obese, Overweight, Normal, Underweight, Severely Underweight)	Classified according to: =IF(N2>=35,"Severely Obese",IF(N2>=30,"Obese",IF(N2>=25,"Overweight",IF(N2>=18.5,"Normal",IF(N2>=16,"Underweight",IF(N2>=0,"Severely Underweight",""))))))
Smoking	Factor (Non, Ex, Smoker)	Smoking status
DiagDate	Date	Date of diagnosis of BX
Cause	Factor (ABPA, Idiopathic, Immunodeficieny, Other, PCD)	Aetiology of bronchiectasis
PPxABx	Binary (0/1)	Prophylactic antiobiotics at clinic visit
AcycloPPx	Binary (0/1)	Prophylactic ACYCLOVIR
AmoxPPx	Binary (0/1)	Prophylactic AMOXICILLIN
AugPPx	Binary (0/1)	Prophylactic AUGMENTIN/CO AMOX
AziPPx	Binary (0/1)	Prophylactic AZITHROMYCIN
CazPPx	Binary (0/1)	Prophylactic CEFTAZIDIME
CaxPPx	Binary (0/1)	Prophylactic CEFTRIAXONE
CiproPPx	Binary (0/1)	Prophylactic CIPROFLOXACIN
ClaPPx	Binary (0/1)	Prophylactic ClARITHROMYCIN
ColoPPx	Binary (0/1)	Prophylactic COLOMYCIN
SepPPx	Binary (0/1)	Prophylactic CO-TRIMOXAZOLE(SEPTRIN)
DoxyPPx	Binary (0/1)	Prophylactic DOXYCYCLINE
EthPPx	Binary (0/1)	Prophylactic ETHAMBUTOL
FlucloxPPx	Binary (0/1)	Prophylactic FLUCLOXACILLIN
FluclonPPx	Binary (0/1)	Prophylactic FLUCONAZOLE
GentIVPPx	Binary (0/1)	Prophylactic GENTAMICIN IV
GentNebPPx	Binary (0/1)	Prophylactic GENTAMICIN NEB
MeroIVPPx	Binary (0/1)	Prophylactic MEROPENEM IV
MinoPPx	Binary (0/1)	Prophylactic MINOCYCLINE
MoxiPPx	Binary (0/1)	Prophylactic MOXIFLOXACIN
PenPPx	Binary (0/1)	Prophylactic PENICILLIN
RifPPx	Binary (0/1)	Prophylactic RIFAMPICIN
TazoPPx	Binary (0/1)	Prophylactic TAZOCIN
TriPPx	Binary (0/1)	Prophylactic TRIMETHOPRIM
NRAbxMonth	Binary (0/1)	Additional non respiratory antibiotics during the previous month
NRAbxVisit	Binary (0/1)	Additional non respiratory antibiotics at visit
AcycloNR	Binary (0/1)	Non respiratory ACYCLOVIR
AmoxNR	Binary (0/1)	Non respiratory AMOXICILLIN
AugNR	Binary (0/1)	Non respiratory AUGMENTIN/CO AMOX
AziNR	Binary (0/1)	Non respiratory AZITHROMYCIN
CamNR	Binary (0/1)	Non respiratory CHLORAMPHENICOL
CiproNR	Binary (0/1)	Non respiratory CIPROFLOXACIN
DoxyNR	Binary (0/1)	Non respiratory DOXYCYCLINE
FlucloxNR	Binary (0/1)	Non respiratory FLUCLOXACILLIN
OxyNR	Binary (0/1)	Non respiratory OXYTETRACYCLINE
TriNR	Binary (0/1)	Non respiratory TRIMETHOPRIM
ExacMonth	Binary (0/1)	Exacerbation antibiotics during previous month
ExacVisit	Binary (0/1)	Exacerbation antibiotics at visit
AcycloEx	Binary (0/1)	Exacerbation ACYCLOVIR
AmoxEx	Binary (0/1)	Exacerbation AMOXICILLIN
AugEx	Binary (0/1)	Exacerbation AUGMENTIN/CO AMOX
AziEx	Binary (0/1)	Exacerbation AZITHROMYCIN
CazEx	Binary (0/1)	Exacerbation CEFTAZIDIME
CaxEx	Binary (0/1)	Exacerbation CEFTRIAXONE
CepoEx	Binary (0/1)	Exacerbation CEPODOXIME
CiproEx	Binary (0/1)	Exacerbation CIPROFLOXACIN
ClaEx	Binary (0/1)	Exacerbation ClARITHROMYCIN
ColoEx	Binary (0/1)	Exacerbation COLOMYCIN
SepEx	Binary (0/1)	Exacerbation CO-TRIMOXAZOLE(SEPTRIN)
DoxyEx	Binary (0/1)	Exacerbation DOXYCYCLINE
ErythEx	Binary (0/1)	Exacerbation ERYTHROMYCIN
EthEx	Binary (0/1)	Exacerbation ETHAMBUTOL
FlucloxEx	Binary (0/1)	Exacerbation FLUCLOXACILLIN
FluclonEx	Binary (0/1)	Exacerbation FLUCONAZOLE
GentIVEx	Binary (0/1)	Exacerbation GENTAMICIN IV
GentNebEx	Binary (0/1)	Exacerbation GENTAMICIN NEB
ErtaIVEx	Binary (0/1)	Exacerbation IV ERTAPENEM
MeroIVEx	Binary (0/1)	Exacerbation MEROPENEM IV
MinoEx	Binary (0/1)	Exacerbation MINOCYCLINE
MoxiEx	Binary (0/1)	Exacerbation MOXIFLOXACIN
PenEx	Binary (0/1)	Exacerbation PENICILIN
RifEx	Binary (0/1)	Exacerbation RIFAMPICIN
TazoEx	Binary (0/1)	Exacerbation TAZOCIN
TriEx	Binary (0/1)	Exacerbation TRIMETHOPRIM
FEV1	Numeric	Forced expiratory volume
FEV1pp	Numeric	Percent predicted forced expiratory volume
FVC	Numeric	Forced vital capacity
FVCpp	Numeric	Percent predicted forced vital capacity
PrevPSA	Binary (0/1)	Previous positive Pseudomonas aeruginosa isolation
FirstPSA	Binary (0/1)	Year of first positive Pseudomonas aeruginosa isolation
YrsPSA	Numeric	Time since first positive Pseudomonas aeruginosa isolation in years
NewPSA	Binary (0/1)	New Pseudomonas aeruginosa isolate during study
Sputum	Binary (0/1)	Sample obtained (redundant for the sequencing results)
Growth	Binary (0/1)	Any bacterial growth on clinical culture
URTF	Binary (0/1)	Growth of upper respiratory tract flora
PSA	Ordinal (0 no growth, 1 scanty, 2 moderate, 3 heavy)	Pseudmonas aeruginosa isolation
MucPSA	Ordinal (0 no growth, 1 scanty, 2 moderate, 3 heavy)	Mucoid Pseudomonas aeruginosa isolation
Mcat	Ordinal (0 no growth, 1 scanty, 2 moderate, 3 heavy)	Moraxella catharrhalis isolation
Bcep	Ordinal (0 no growth, 1 scanty, 2 moderate, 3 heavy)	Burkholderia cepacia isolation
Spneu	Ordinal (0 no growth, 1 scanty, 2 moderate, 3 heavy)	Streptococcus pneumoniae isolation
Saur	Ordinal (0 no growth, 1 scanty, 2 moderate, 3 heavy)	Staphylococcus aureus isolation
MRSA	Ordinal (0 no growth, 1 scanty, 2 moderate, 3 heavy)	Methicillin resistant Staphylococcus aureus isolation
Hflu	Ordinal (0 no growth, 1 scanty, 2 moderate, 3 heavy)	Haemophilus influenzae isolation
MucHflu	Ordinal (0 no growth, 1 scanty, 2 moderate, 3 heavy)	Mucoid Haemophilus influenzae
Candida	Ordinal (0 no growth, 1 scanty, 2 moderate, 3 heavy)	Candida spp. isolation
Asp	Ordinal (0 no growth, 1 scanty, 2 moderate, 3 heavy)	Aspergillus spp. isolation
Pvul	Ordinal (0 no growth, 1 scanty, 2 moderate, 3 heavy)	Proteus vulgaris isolation
Smalt	Ordinal (0 no growth, 1 scanty, 2 moderate, 3 heavy)	Stenotrophomonas maltophilia isolation
GrpCStrep	Ordinal (0 no growth, 1 scanty, 2 moderate, 3 heavy)	Beta-haemolytic group C Streptococcus isolation
Coli	Ordinal (0 no growth, 1 scanty, 2 moderate, 3 heavy)	Coliform isolation
Admiss	Binary (0/1)	Admitted during clinic visit
Spiriva	Binary (0/1)	Respiratory medication: SPIRIVA
InhSteroid	Binary (0/1)	Respiratory medication: STERIOD INH
InhCombin	Binary (0/1)	Respiratory medication: COMBIN INH
OralSteroid	Binary (0/1)	Respiratory medication: ORAL STER
Atro	Binary (0/1)	Respiratory medication: ATROVENT
Posa	Binary (0/1)	Respiratory medication: POSACONAZOLE
Carbo	Binary (0/1)	Respiratory medication: CARBOCISTEINE
Vent	Binary (0/1)	Respiratory medication: VENTOLIN
VentNeb	Binary (0/1)	Respiratory medication: VENTOLIN NEBULISED
Amino	Binary (0/1)	Respiratory medication: AMINOPHYLLINE
Monte	Binary (0/1)	Respiratory medication: MONTELUKAST (SINGULAIR)
IVIG	Binary (0/1)	Respiratory medication: IV IG
SCIG	Binary (0/1)	Respiratory medication: SC IG
Itra	Binary (0/1)	Respiratory medication: ITRACONAZOLE
Vori	Binary (0/1)	Respiratory medication: VORICONAZOLE
NaNeb	Binary (0/1)	Respiratory medication: HYPERTONIC SALINE NEB
NasWash	Binary (0/1)	Respiratory medication: NASAL WASHOUTS
NasSteroid	Binary (0/1)	Respiratory medication: NASAL STEROIDS
Flucon	Binary (0/1)	Respiratory medication: FLUCONAZOLE
Brycanyl	Binary (0/1)	Respiratory medication: BRYCANYL
Serevent	Binary (0/1)	Respiratory medication: SEREVENT
Theo	Binary (0/1)	Respiratory medication: THEOPHYLLINE
O2	Binary (0/1)	Respiratory medication: OXYGEN
Description	Text	Broad sample description (BX or Negative control) required final variable of mapping file for QIIME
